# Supplementary material for: A Population Genomics Approach to Assessing the Genetic Basis of Within-Host Microevolution Underlying Recurrent Cryptococcal Meningitis Infection
Source: PubMed Central journal article supplement (PMC5386865; doi:10.1534/g3.116.037499), 2017-02-10

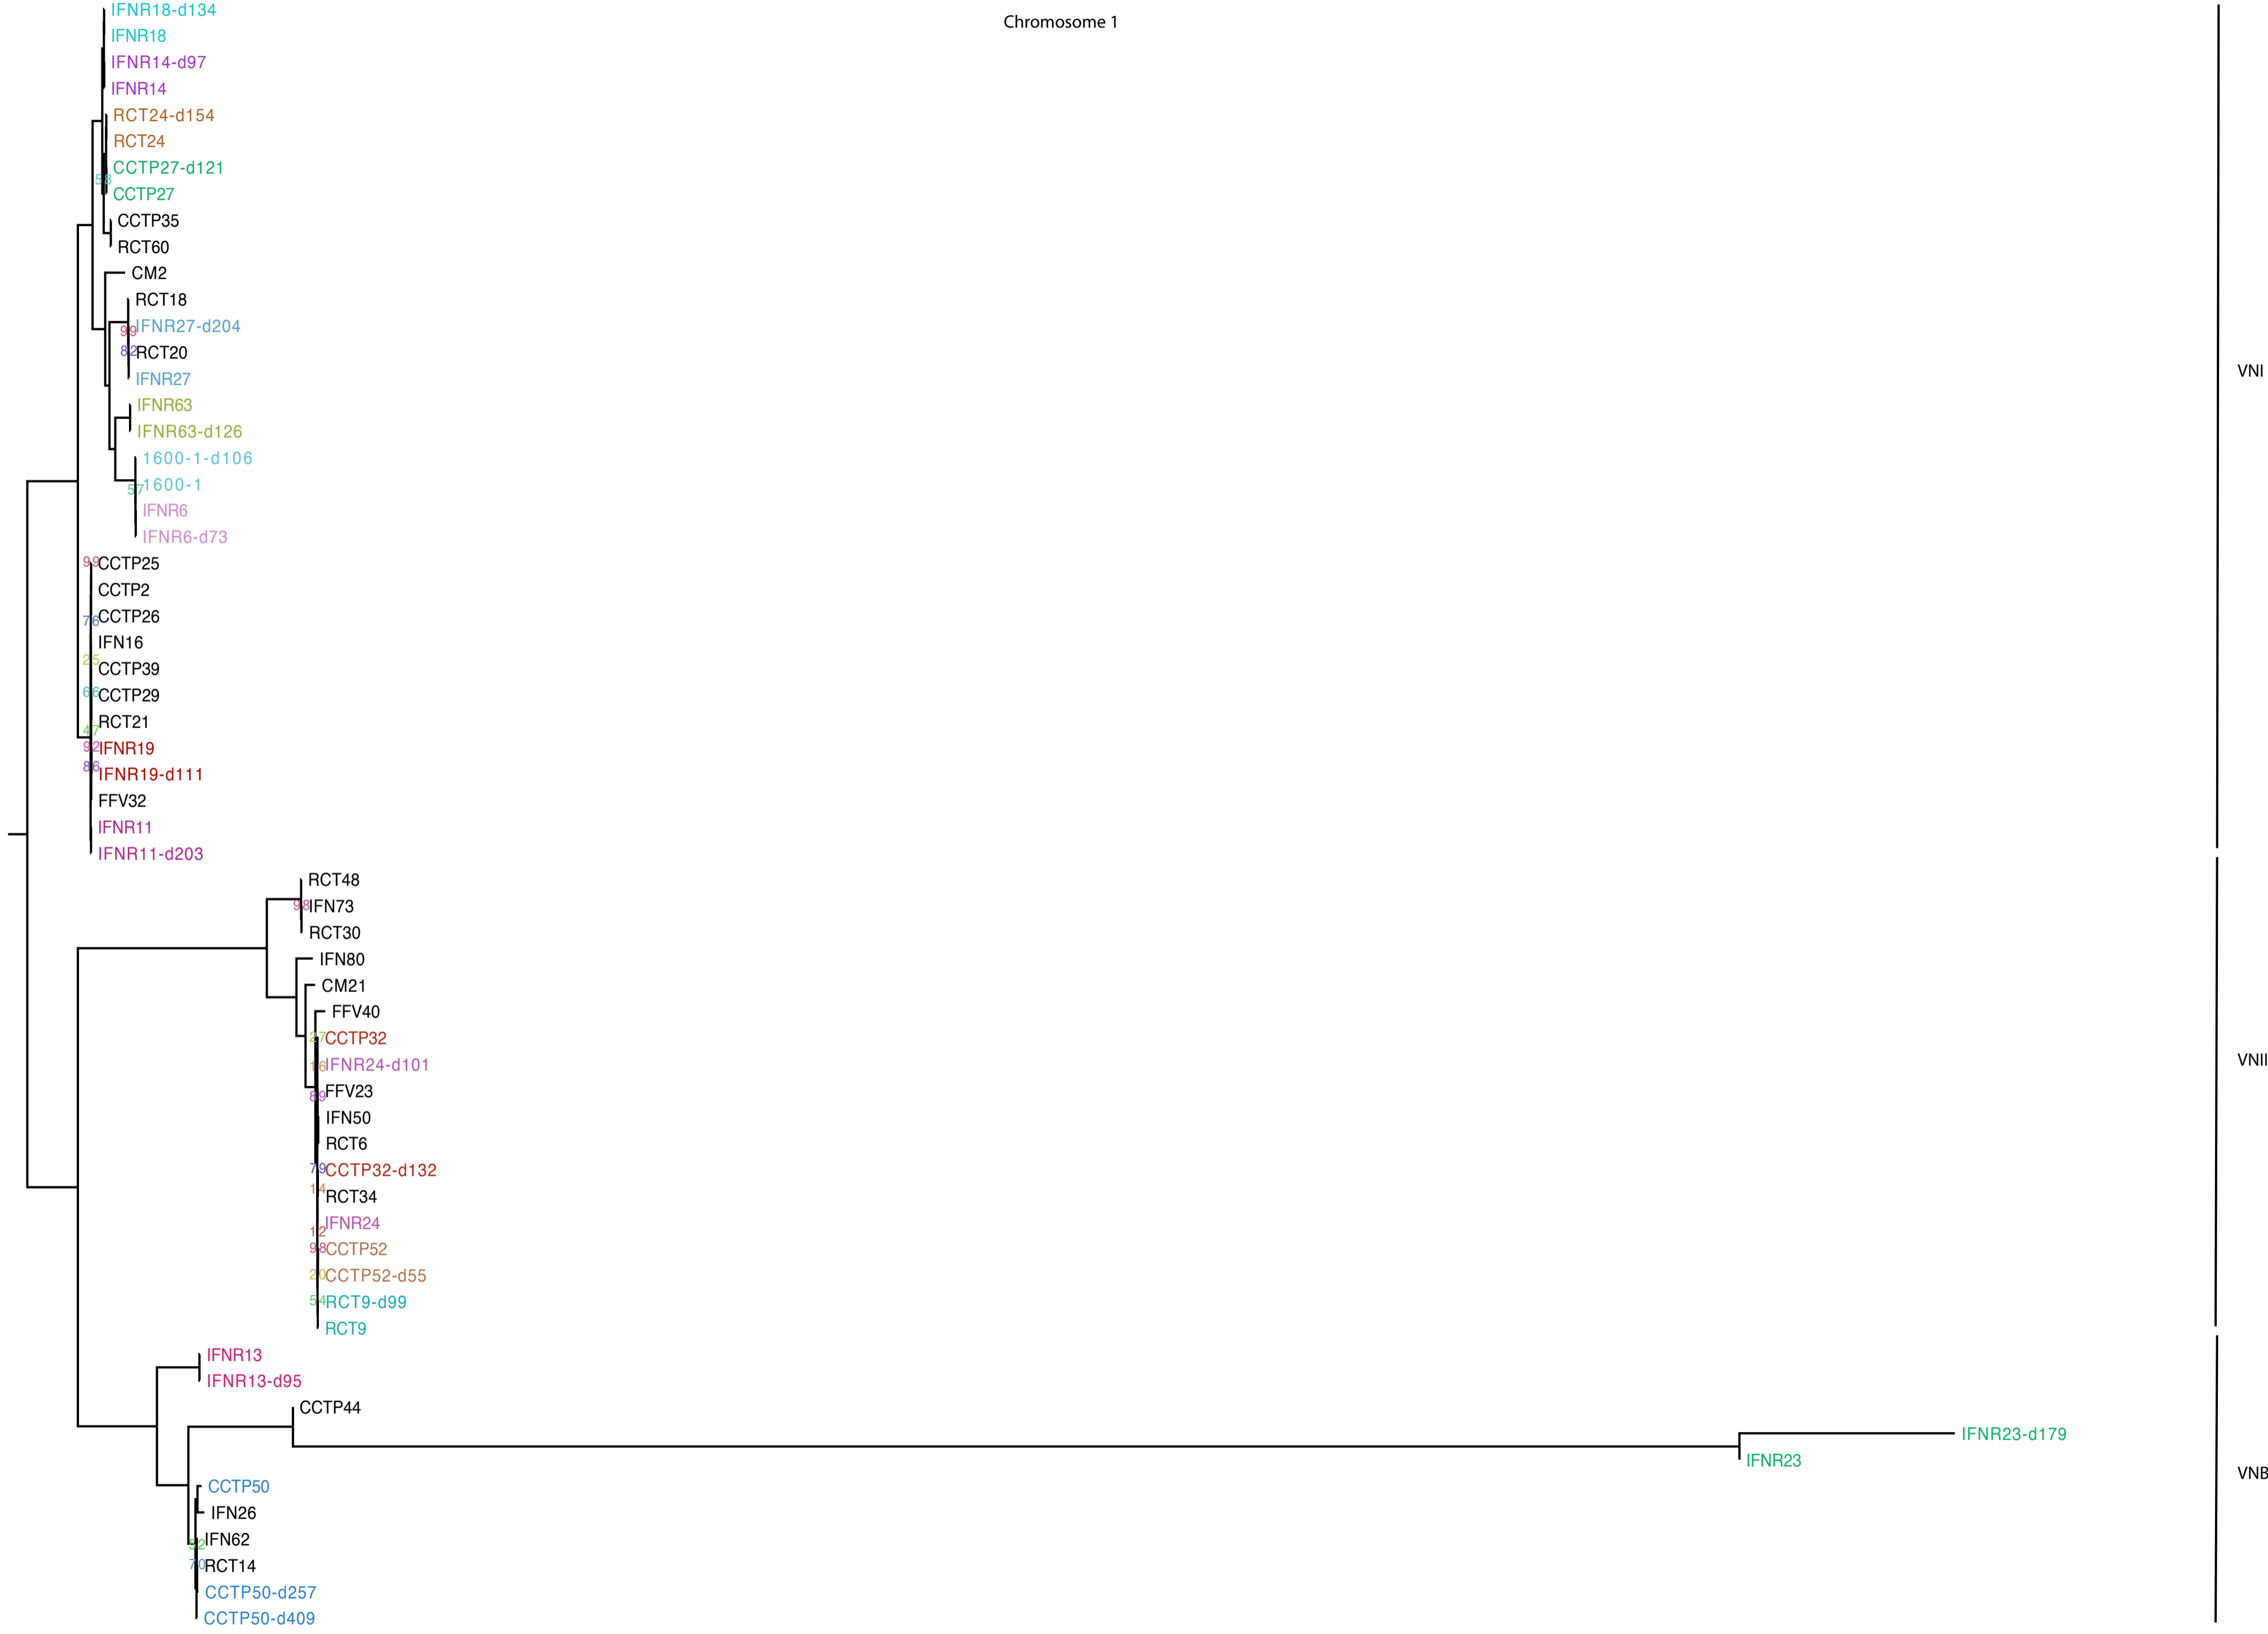

35000 SNPs

Chromosome 2

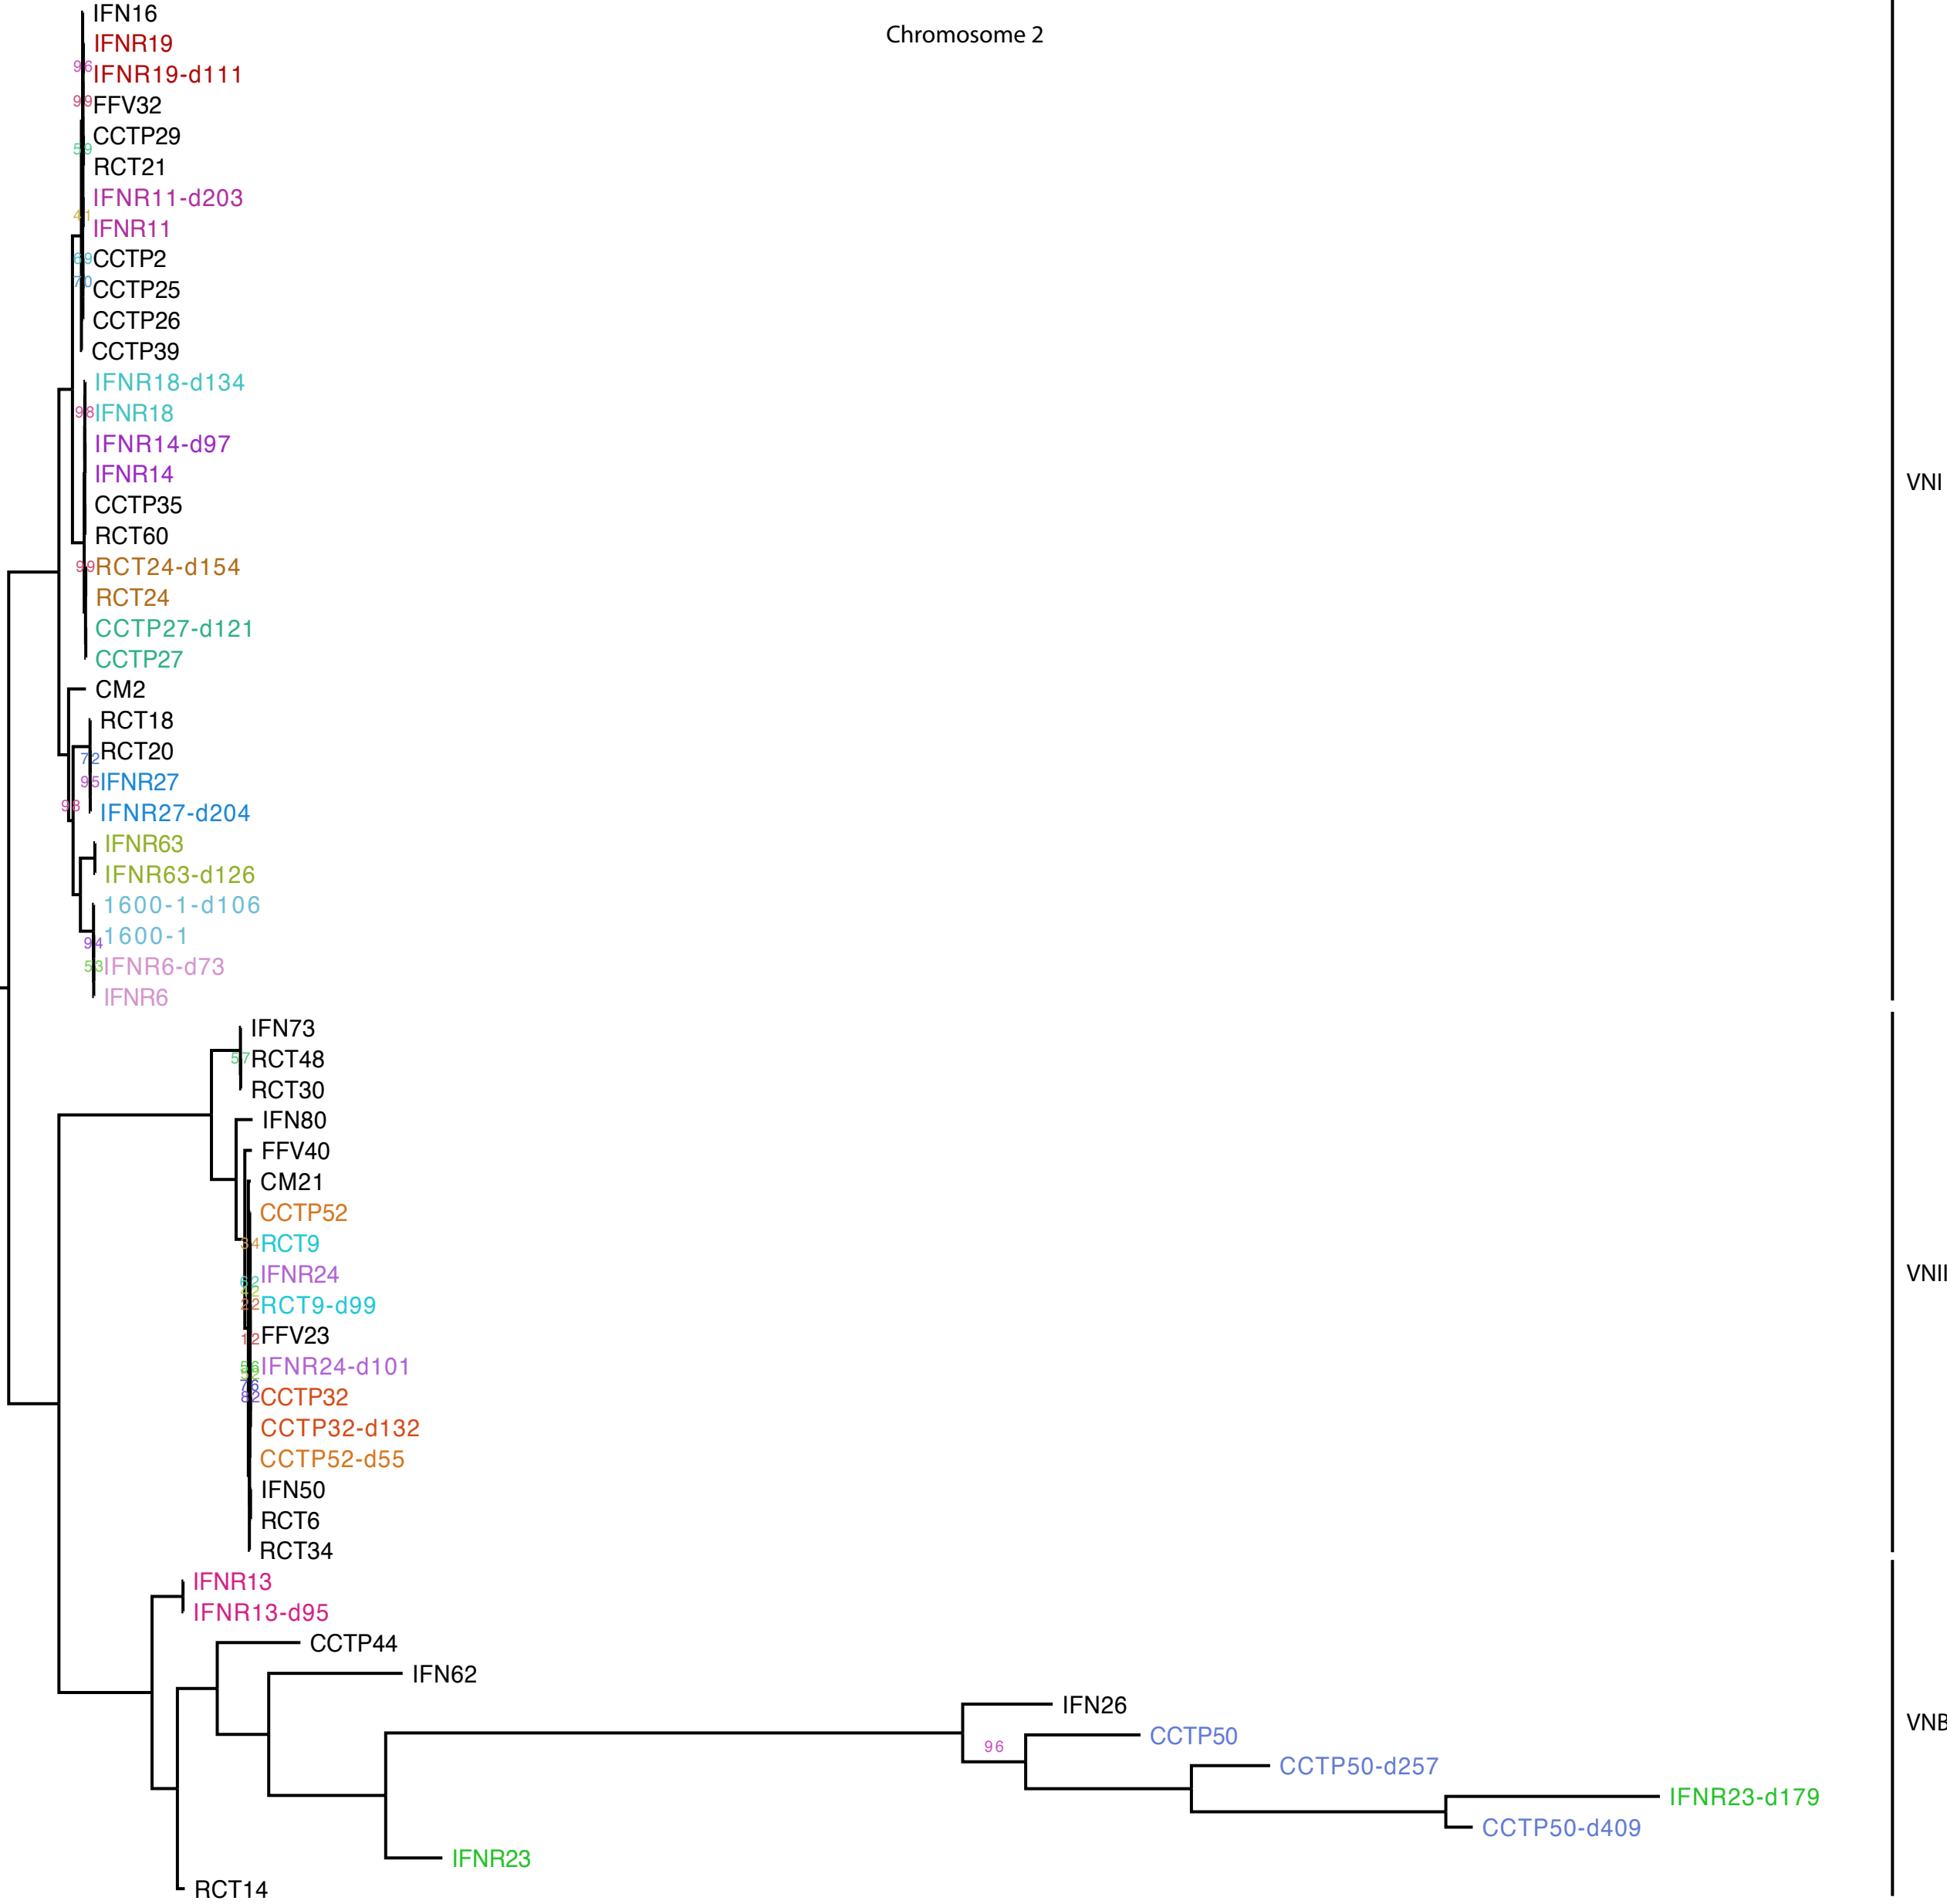

26000 SNPs

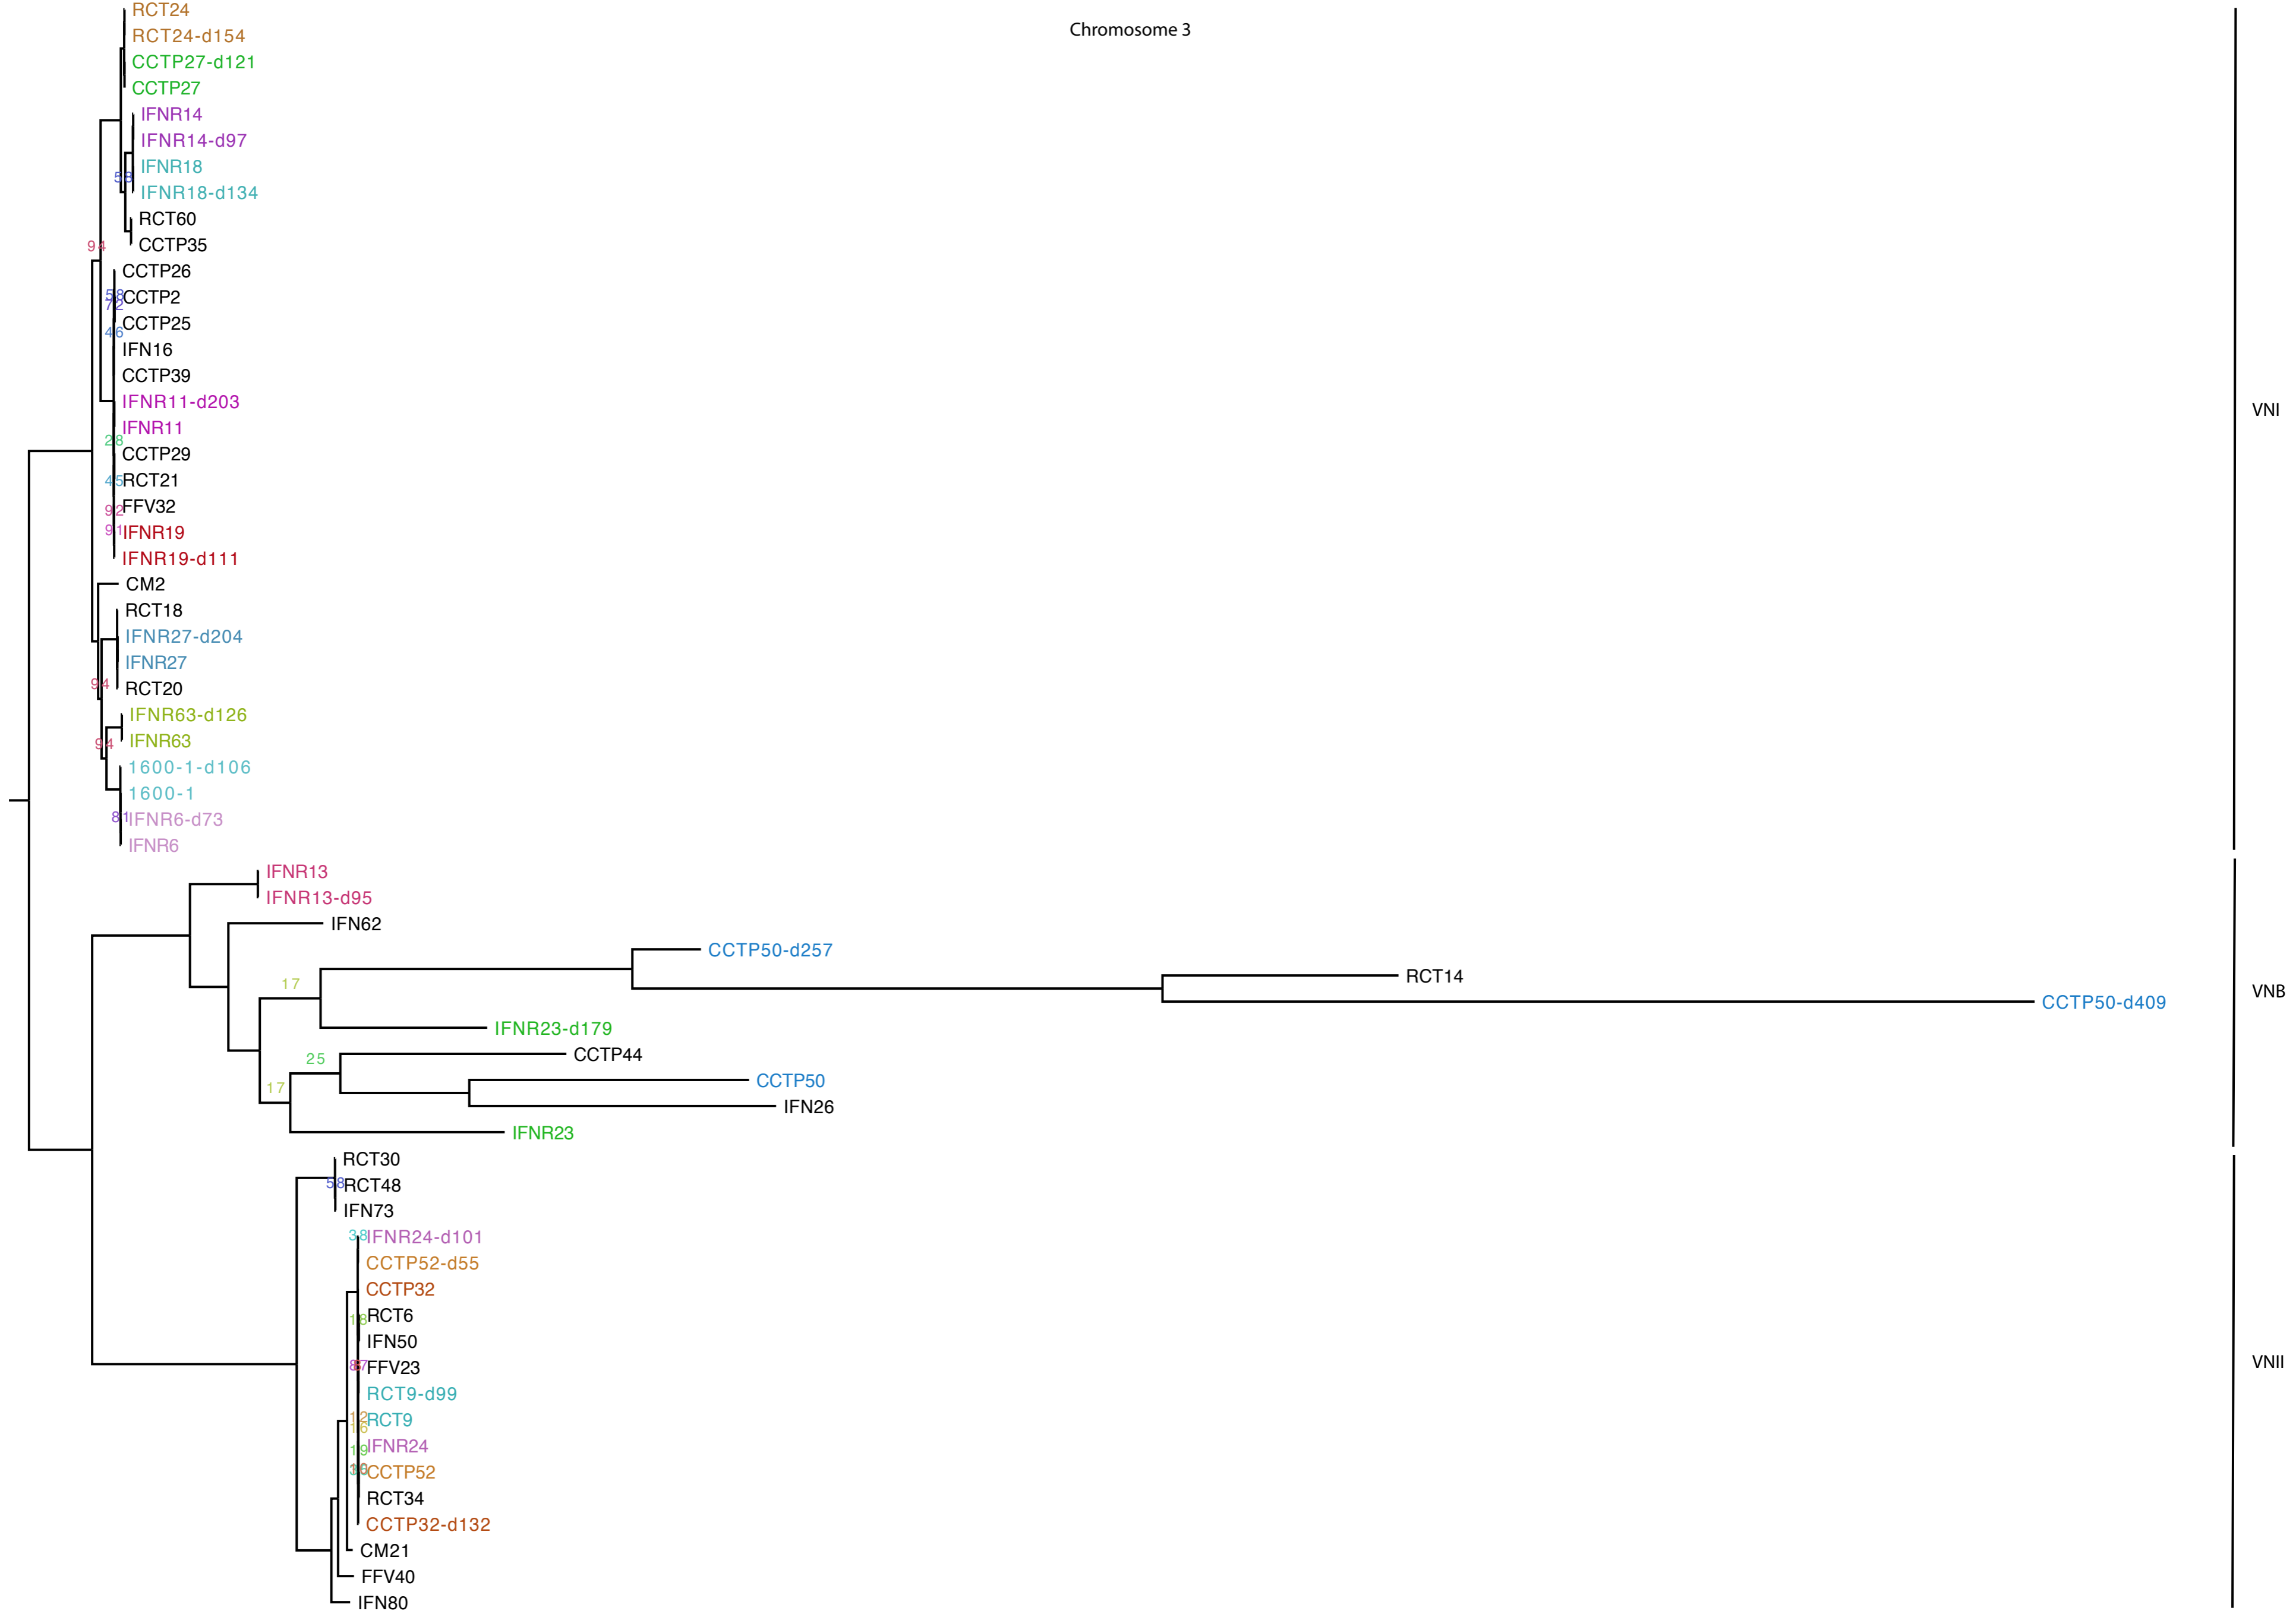

VN I

VN B

VN II

25000 SNPs

Chromosome 4

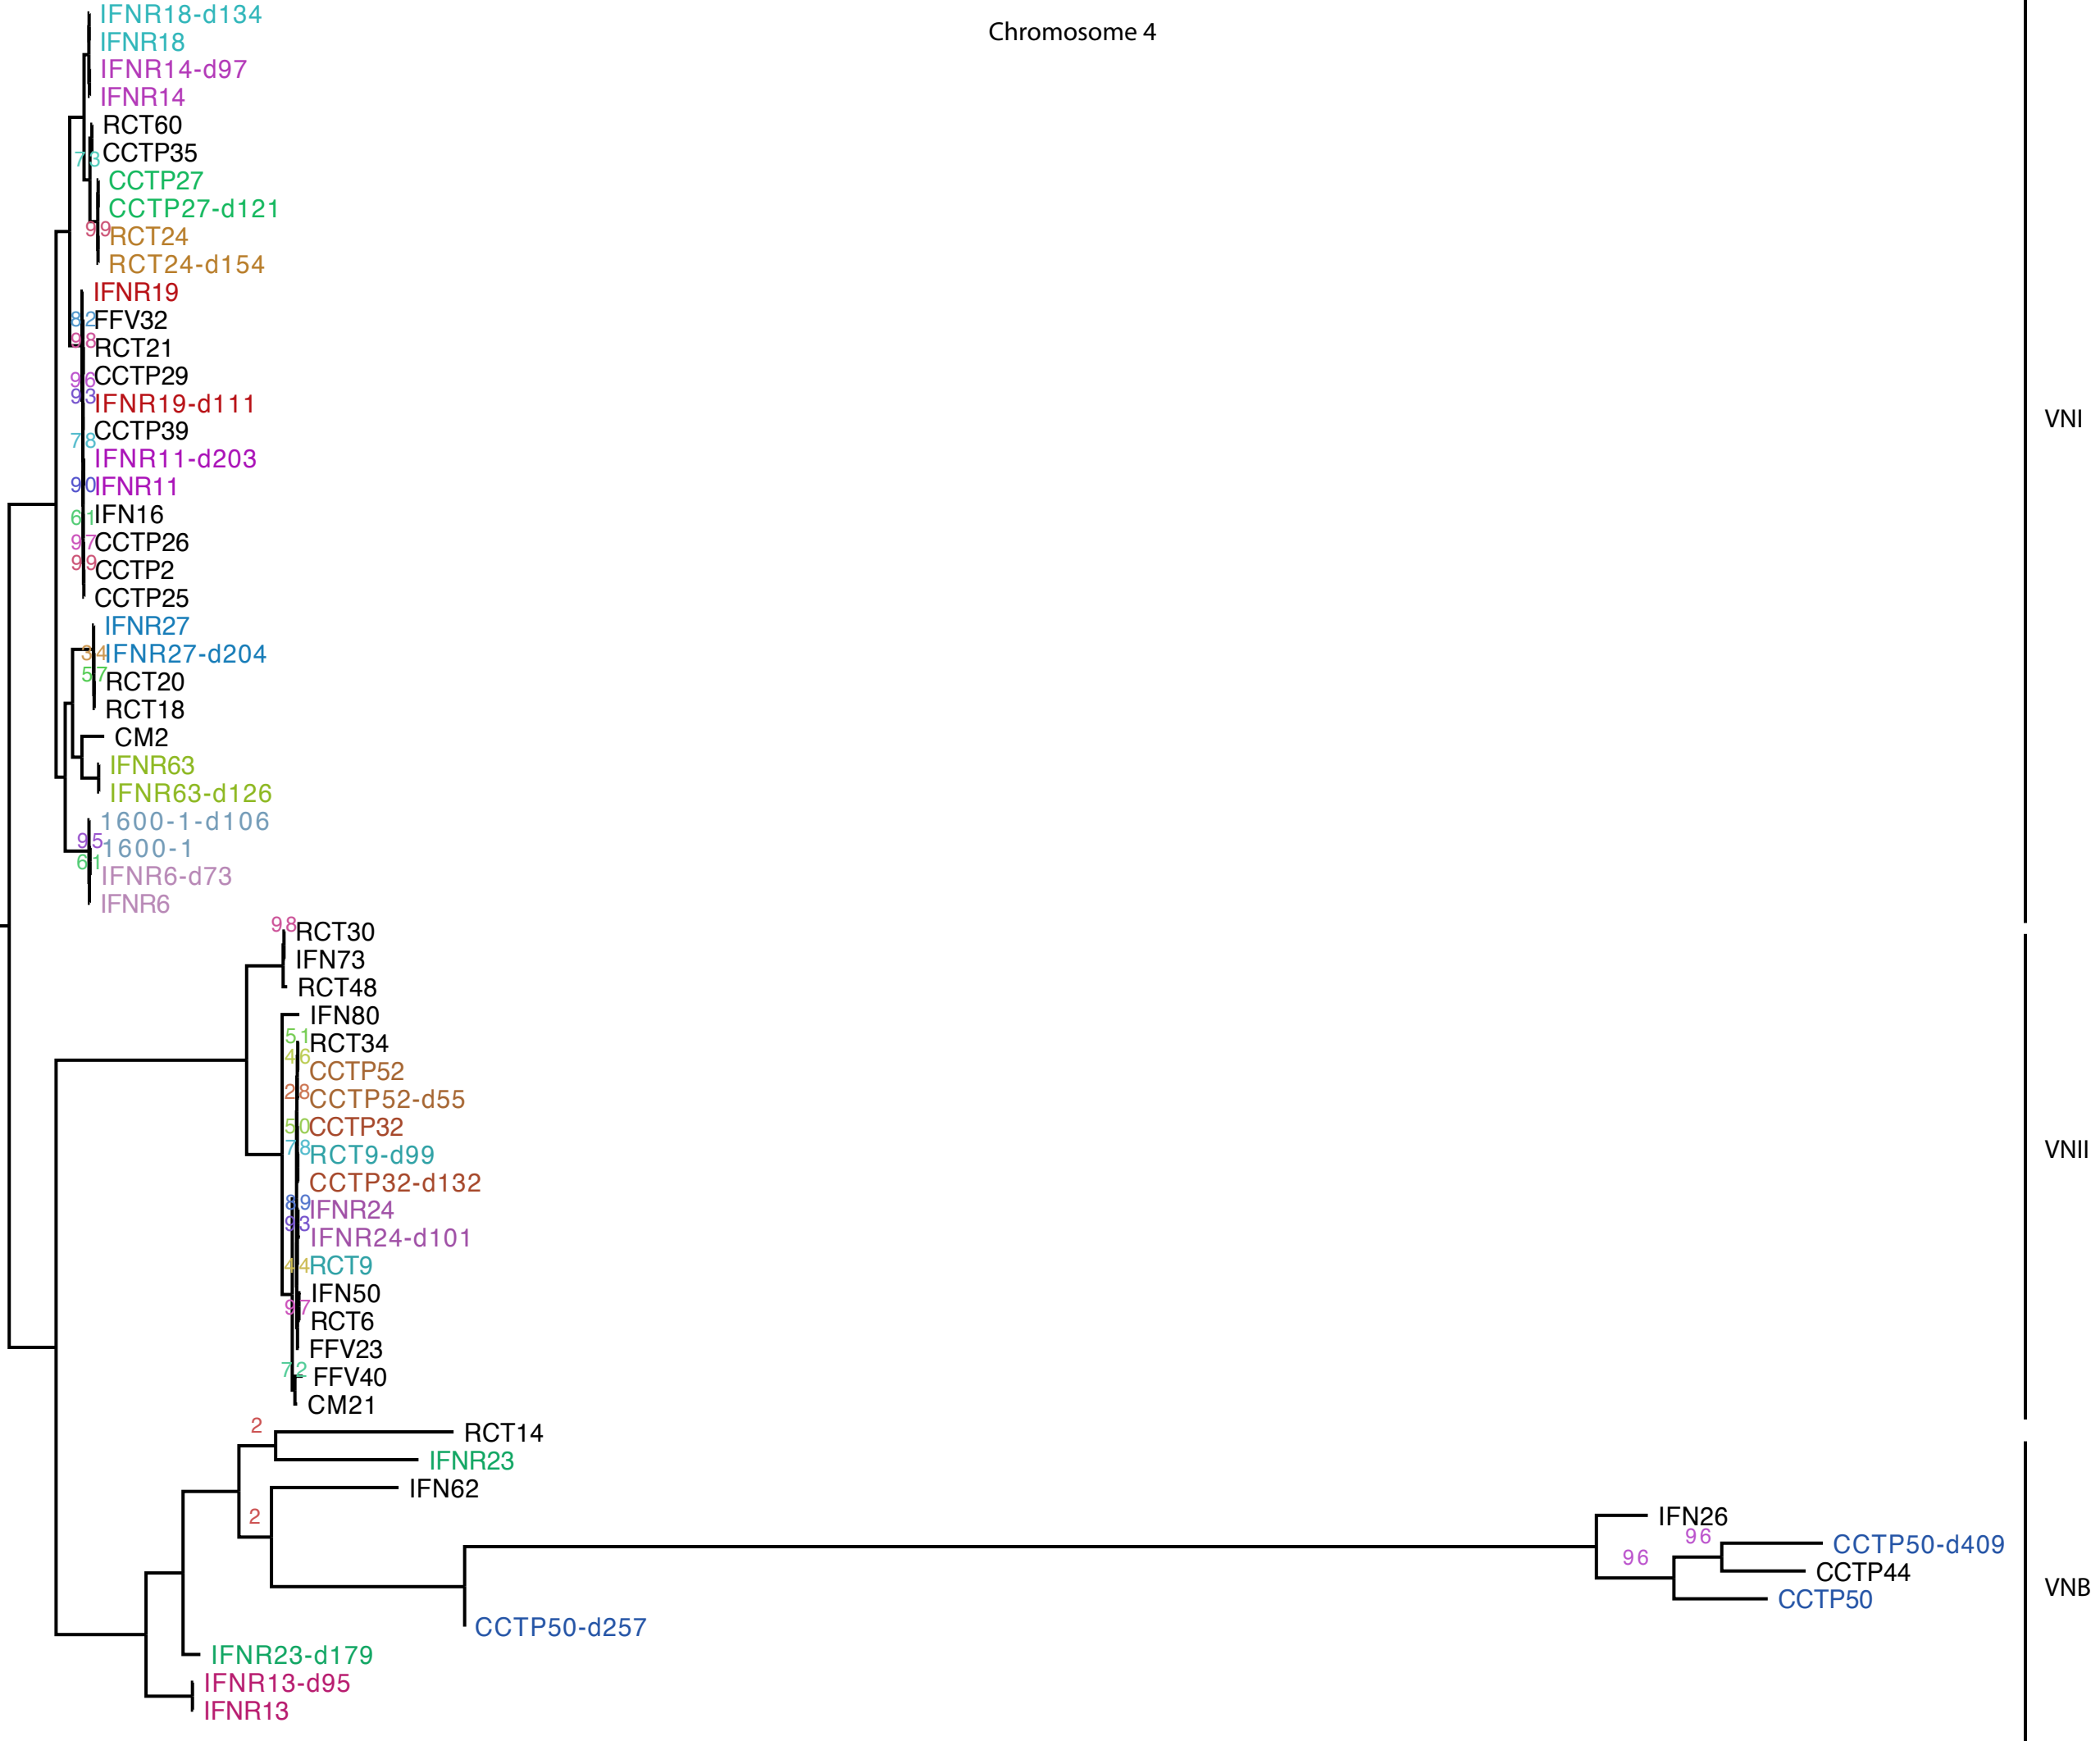

18000 SNPs

Chromosome 5

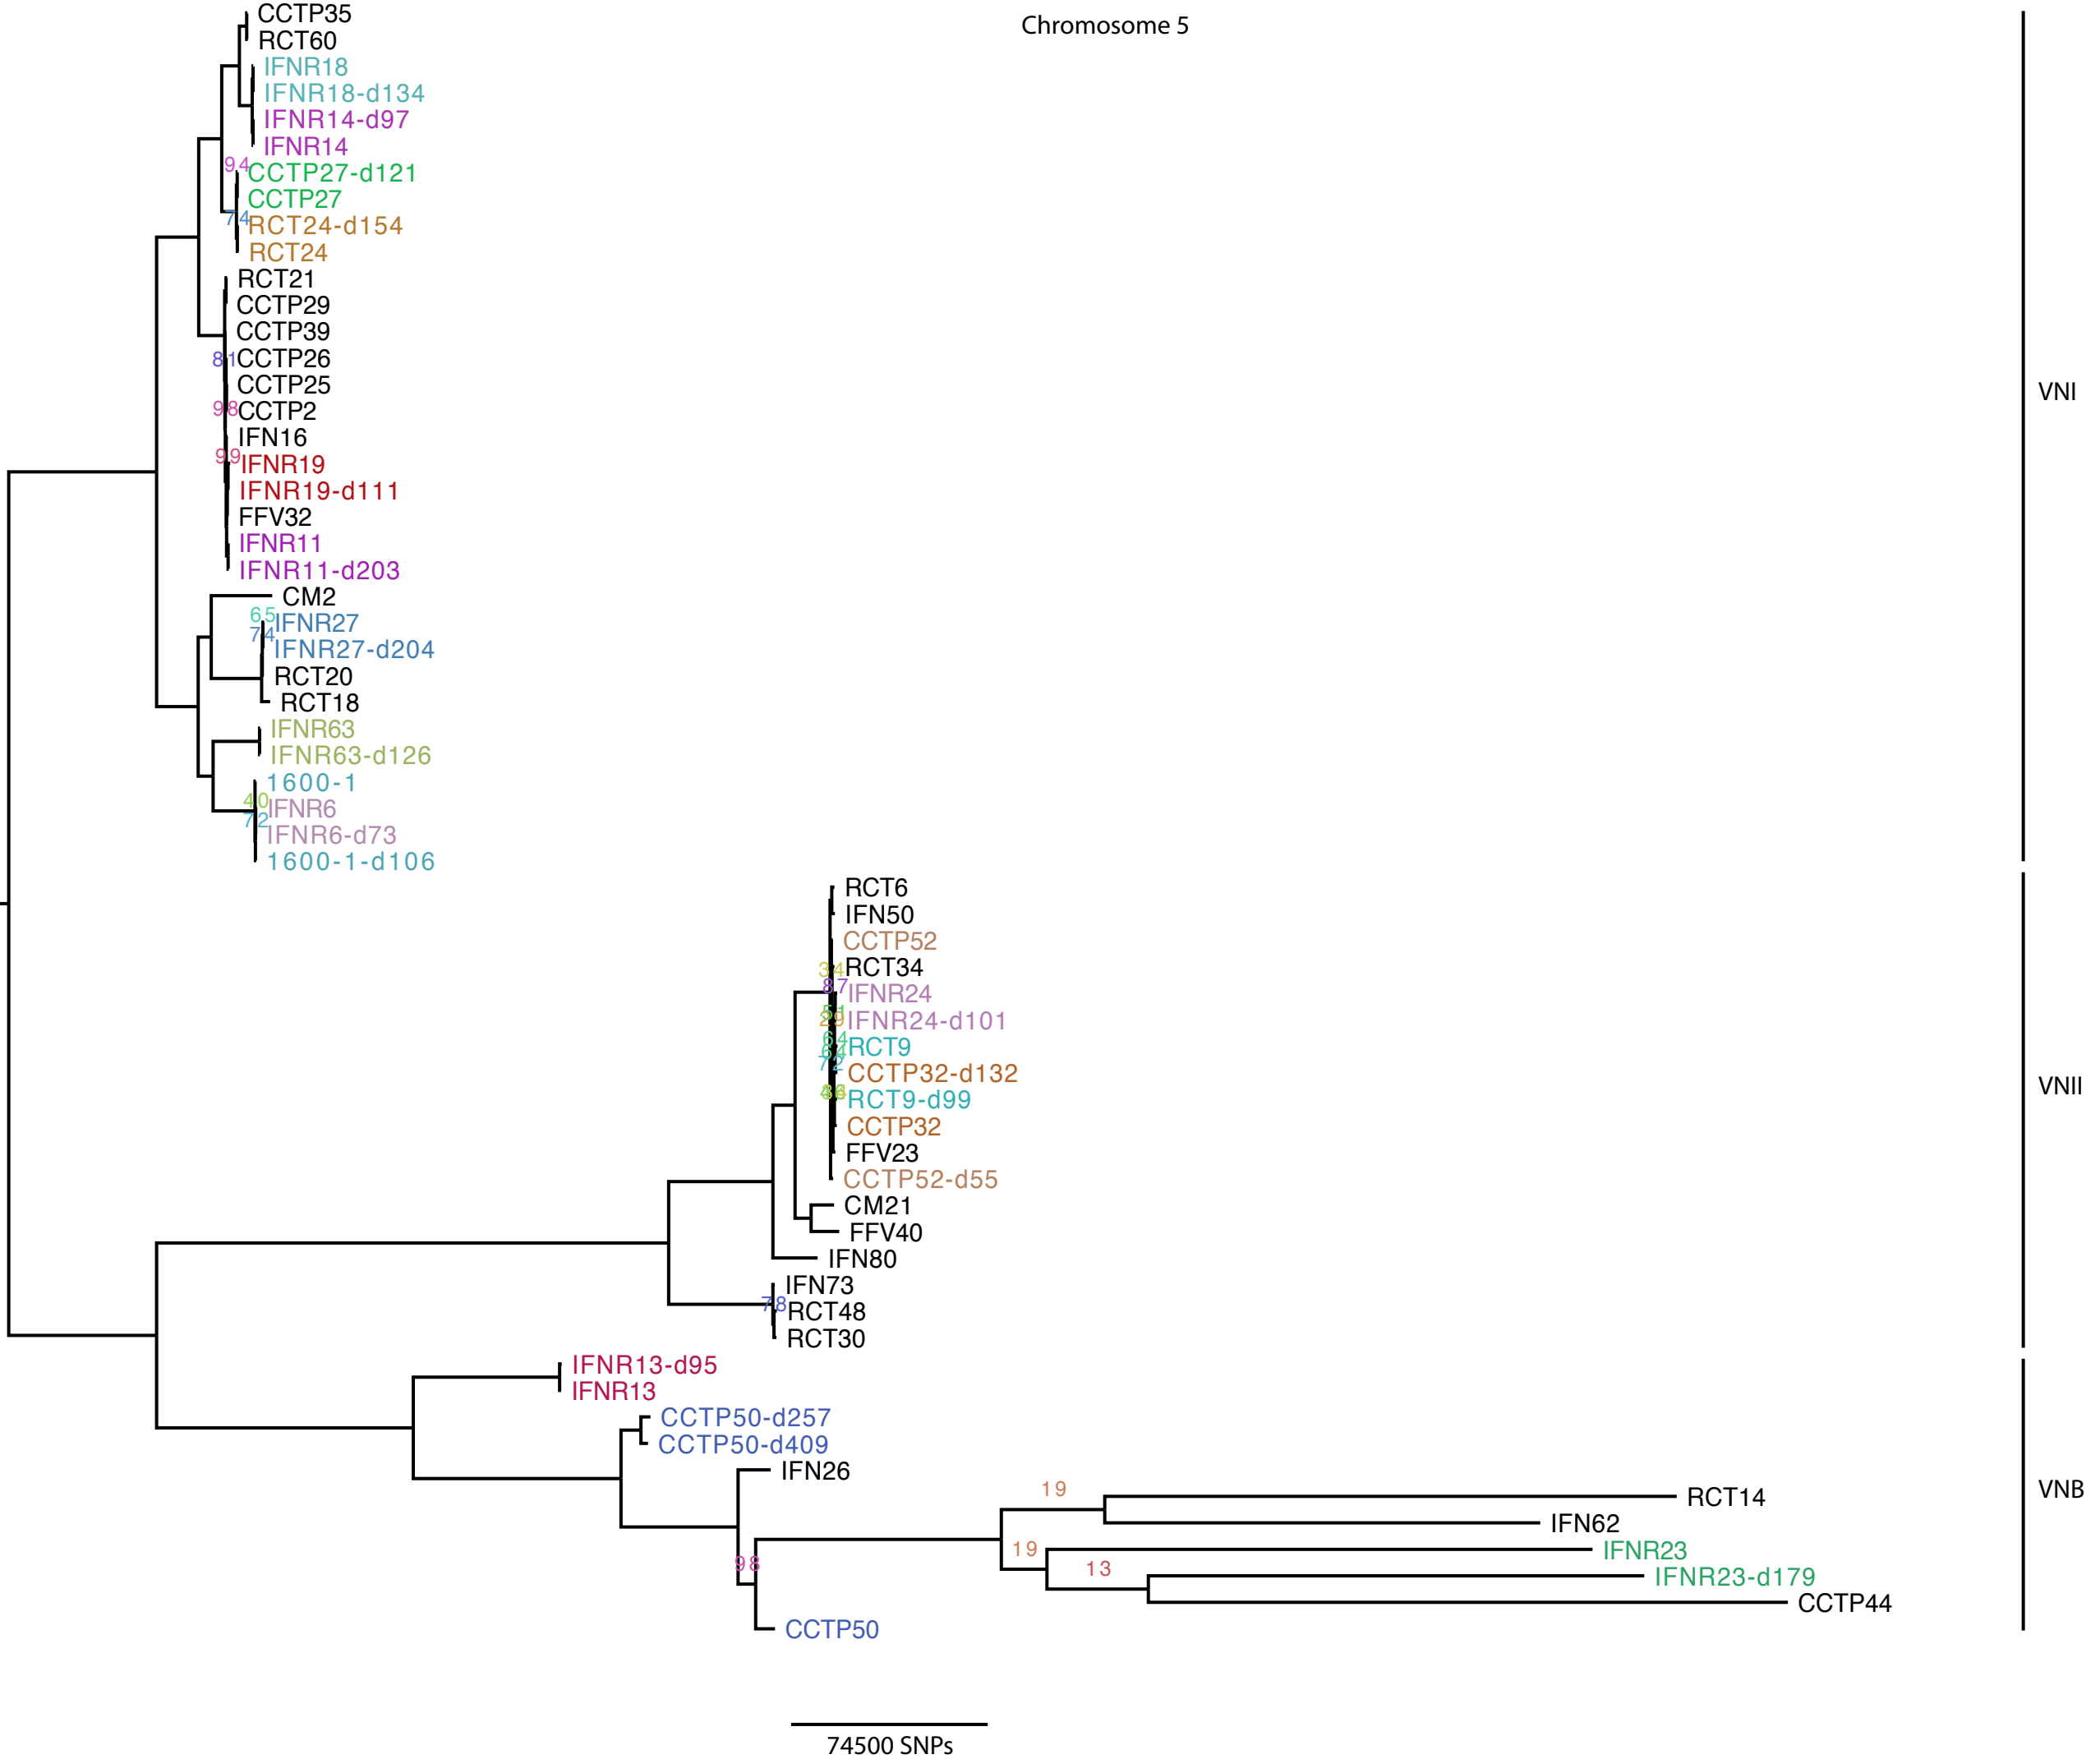

74500 SNPs

Chromosome 6

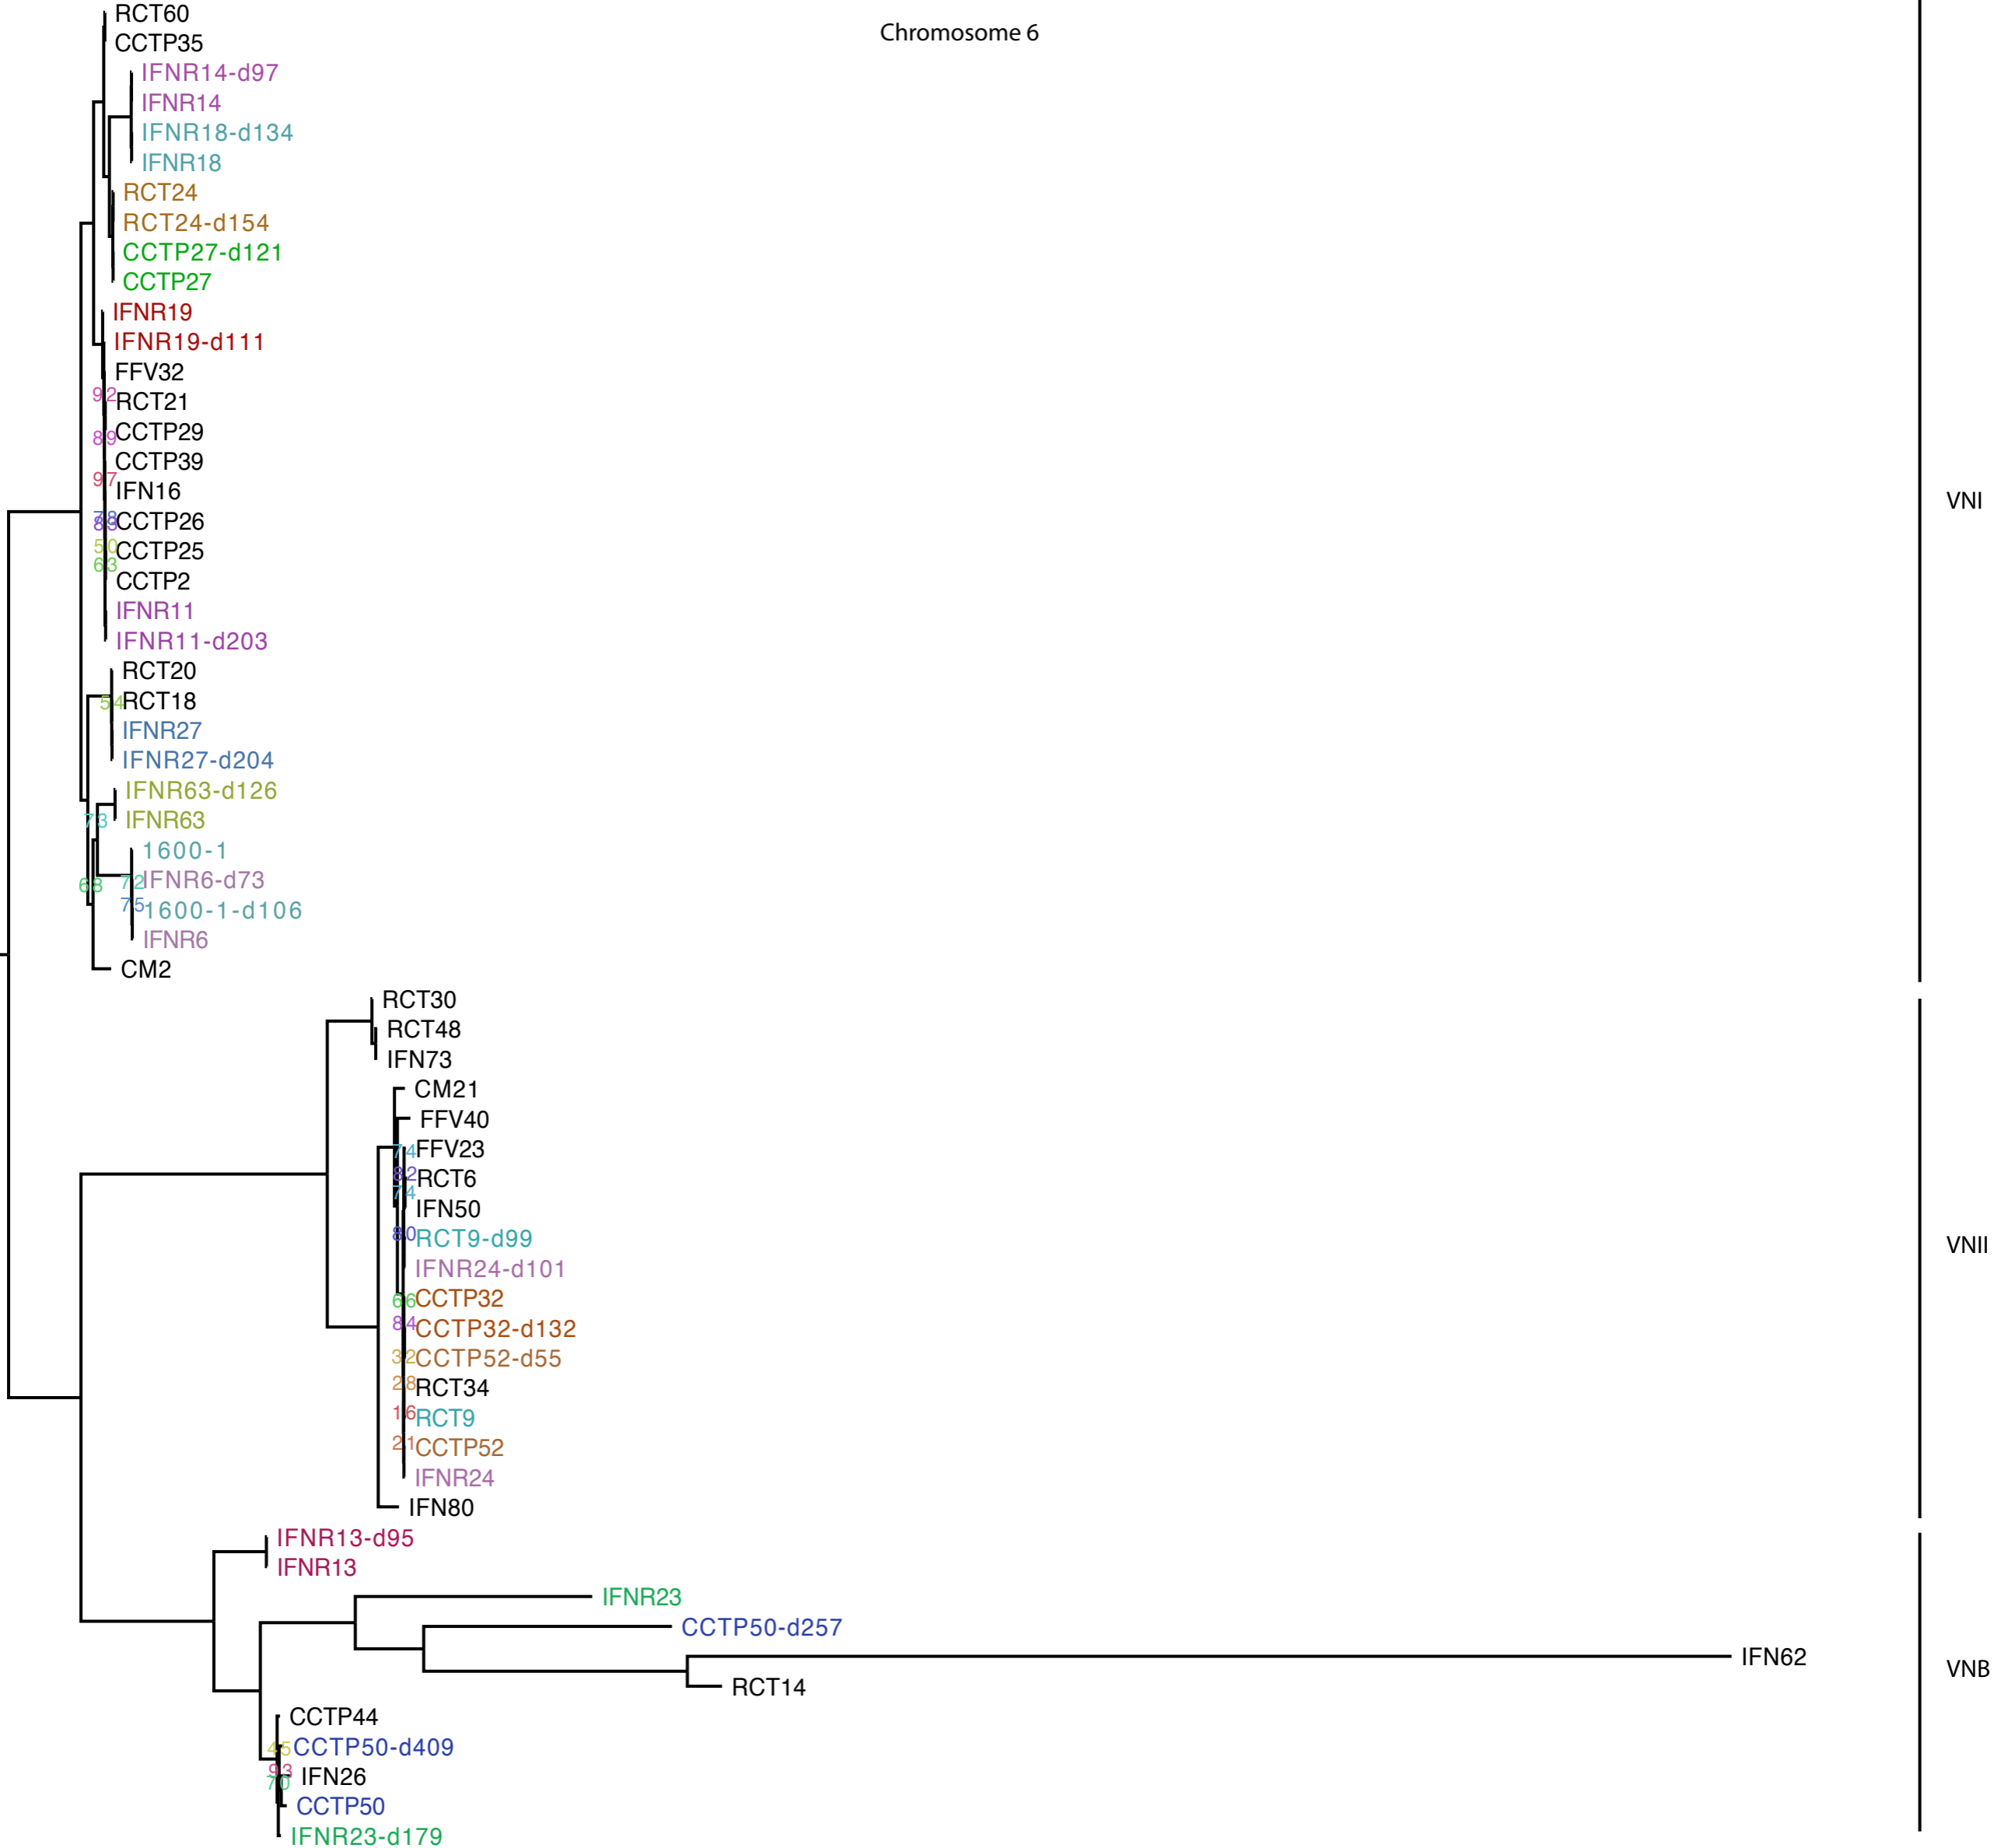

19000 SNPs

Chromosome 7

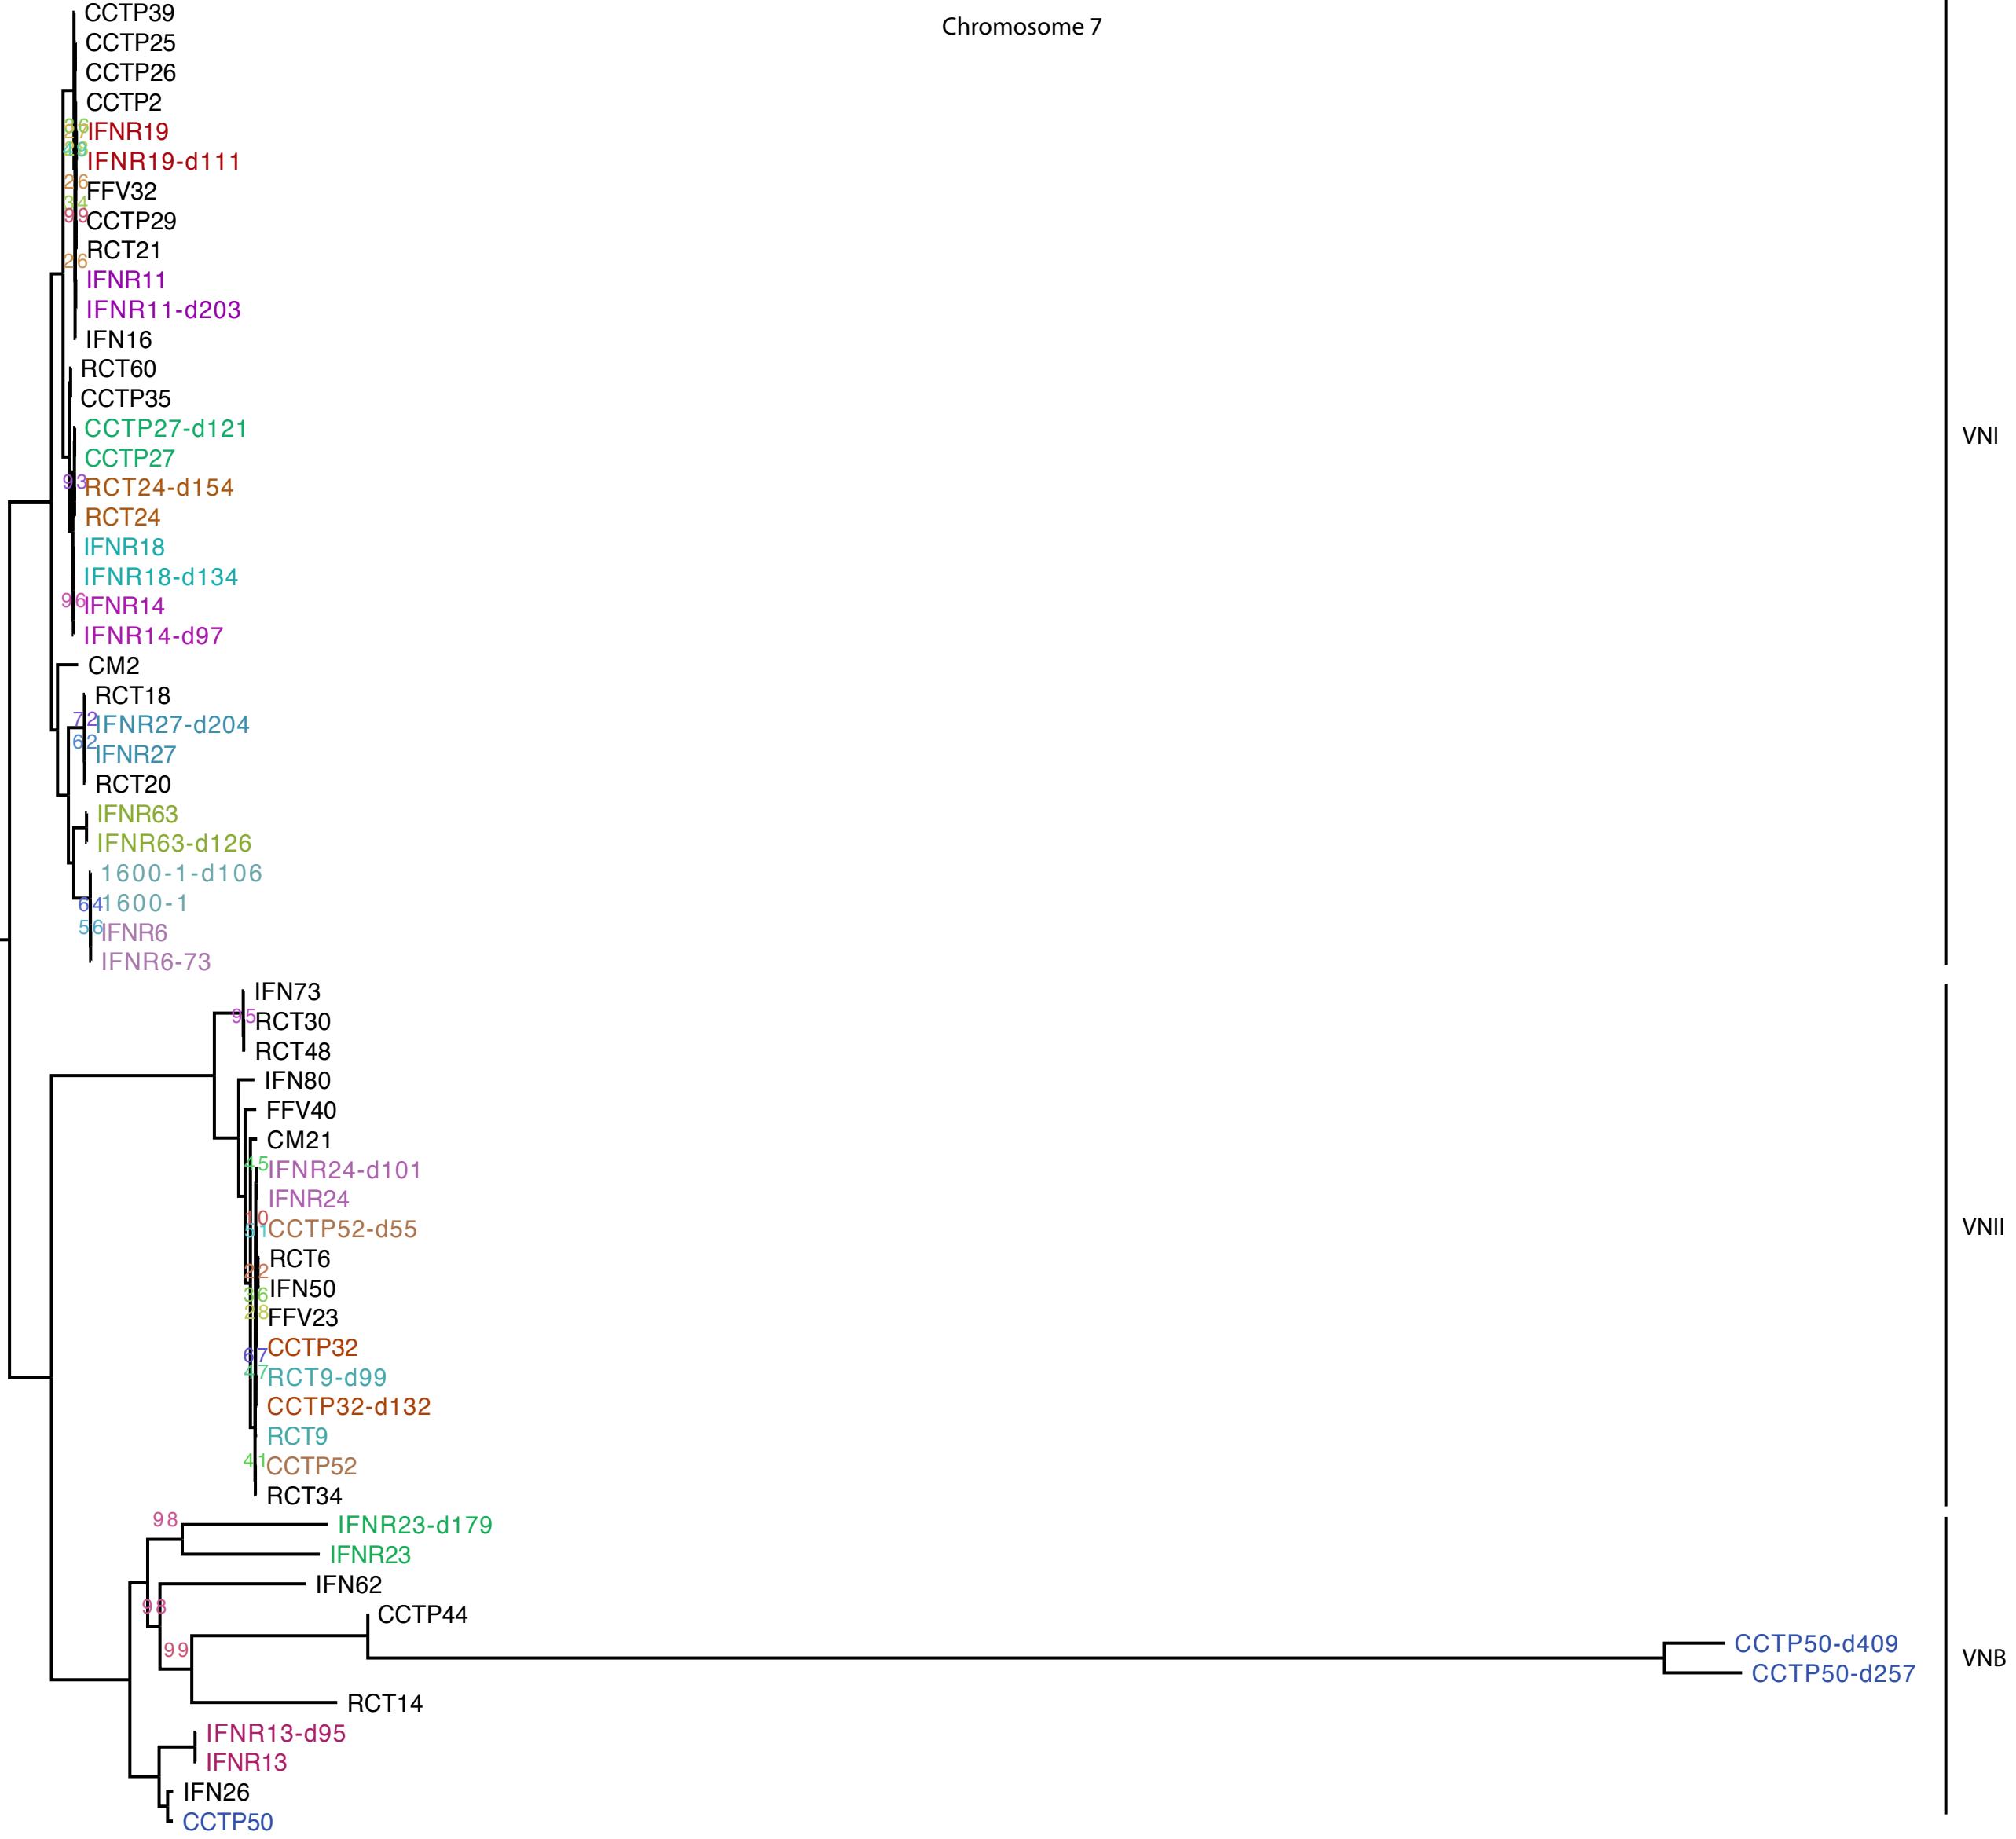

22000 SNPs

Chromosome 8

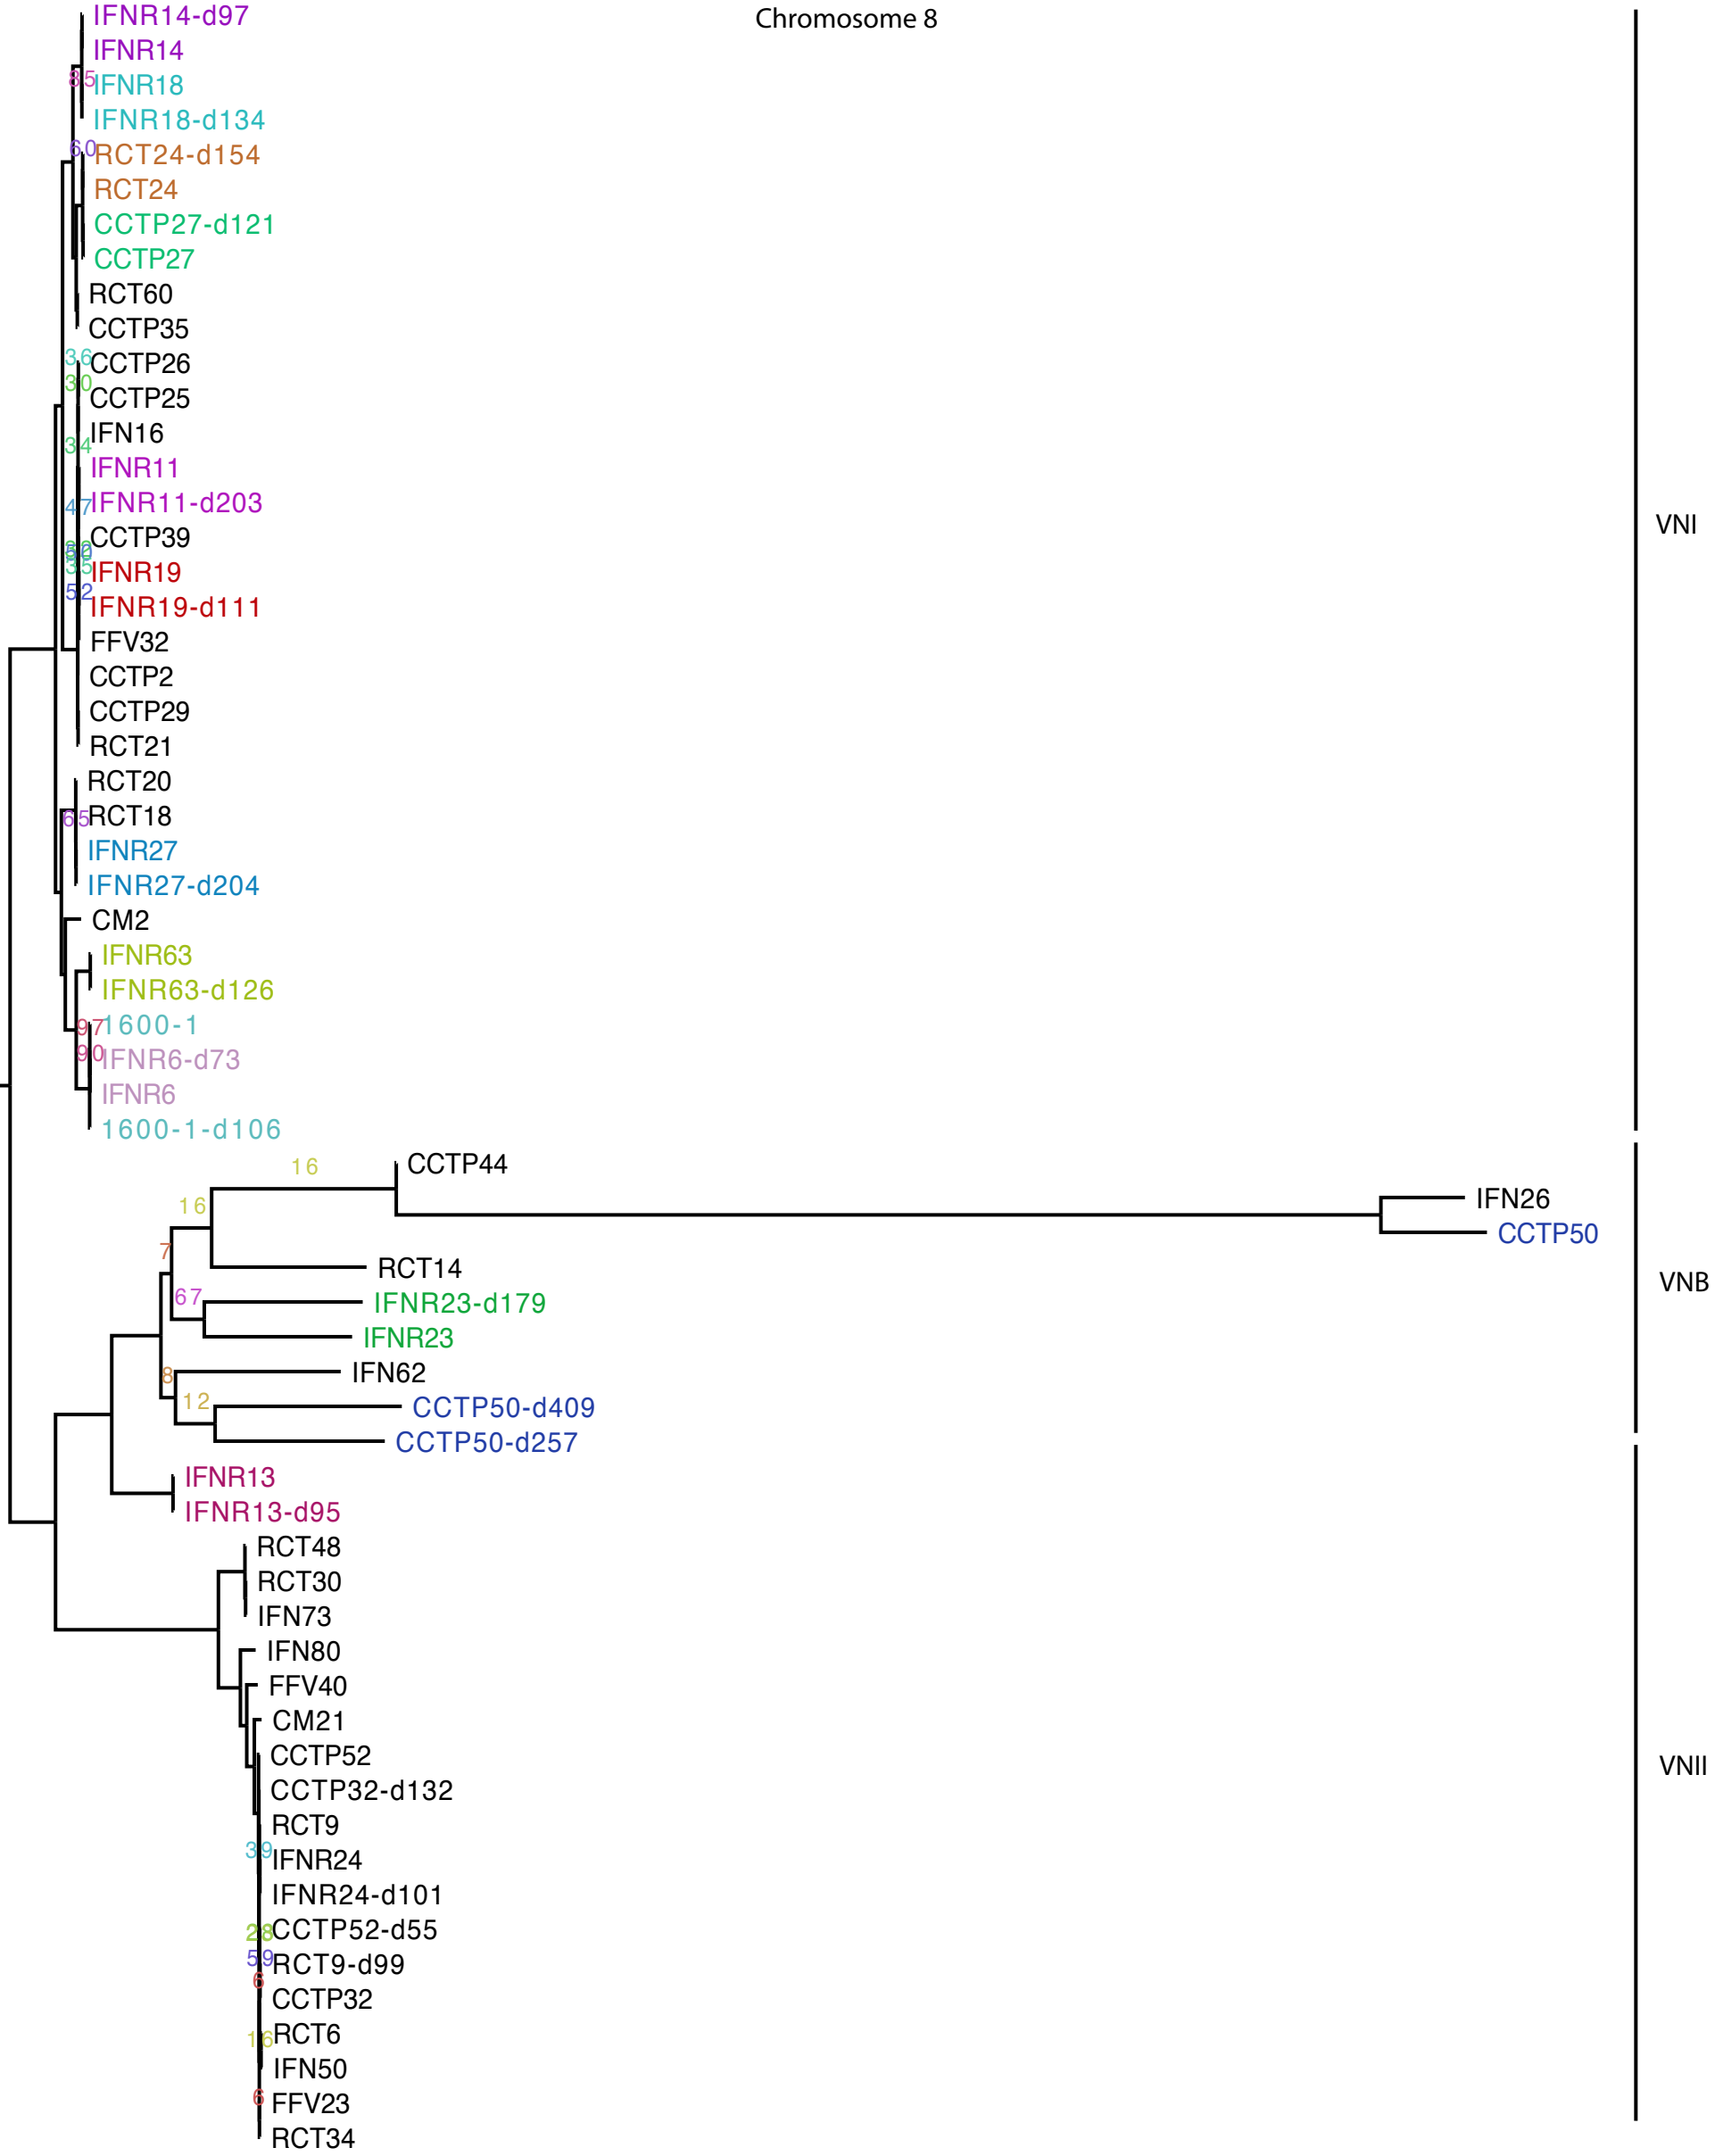

21000 SNPs



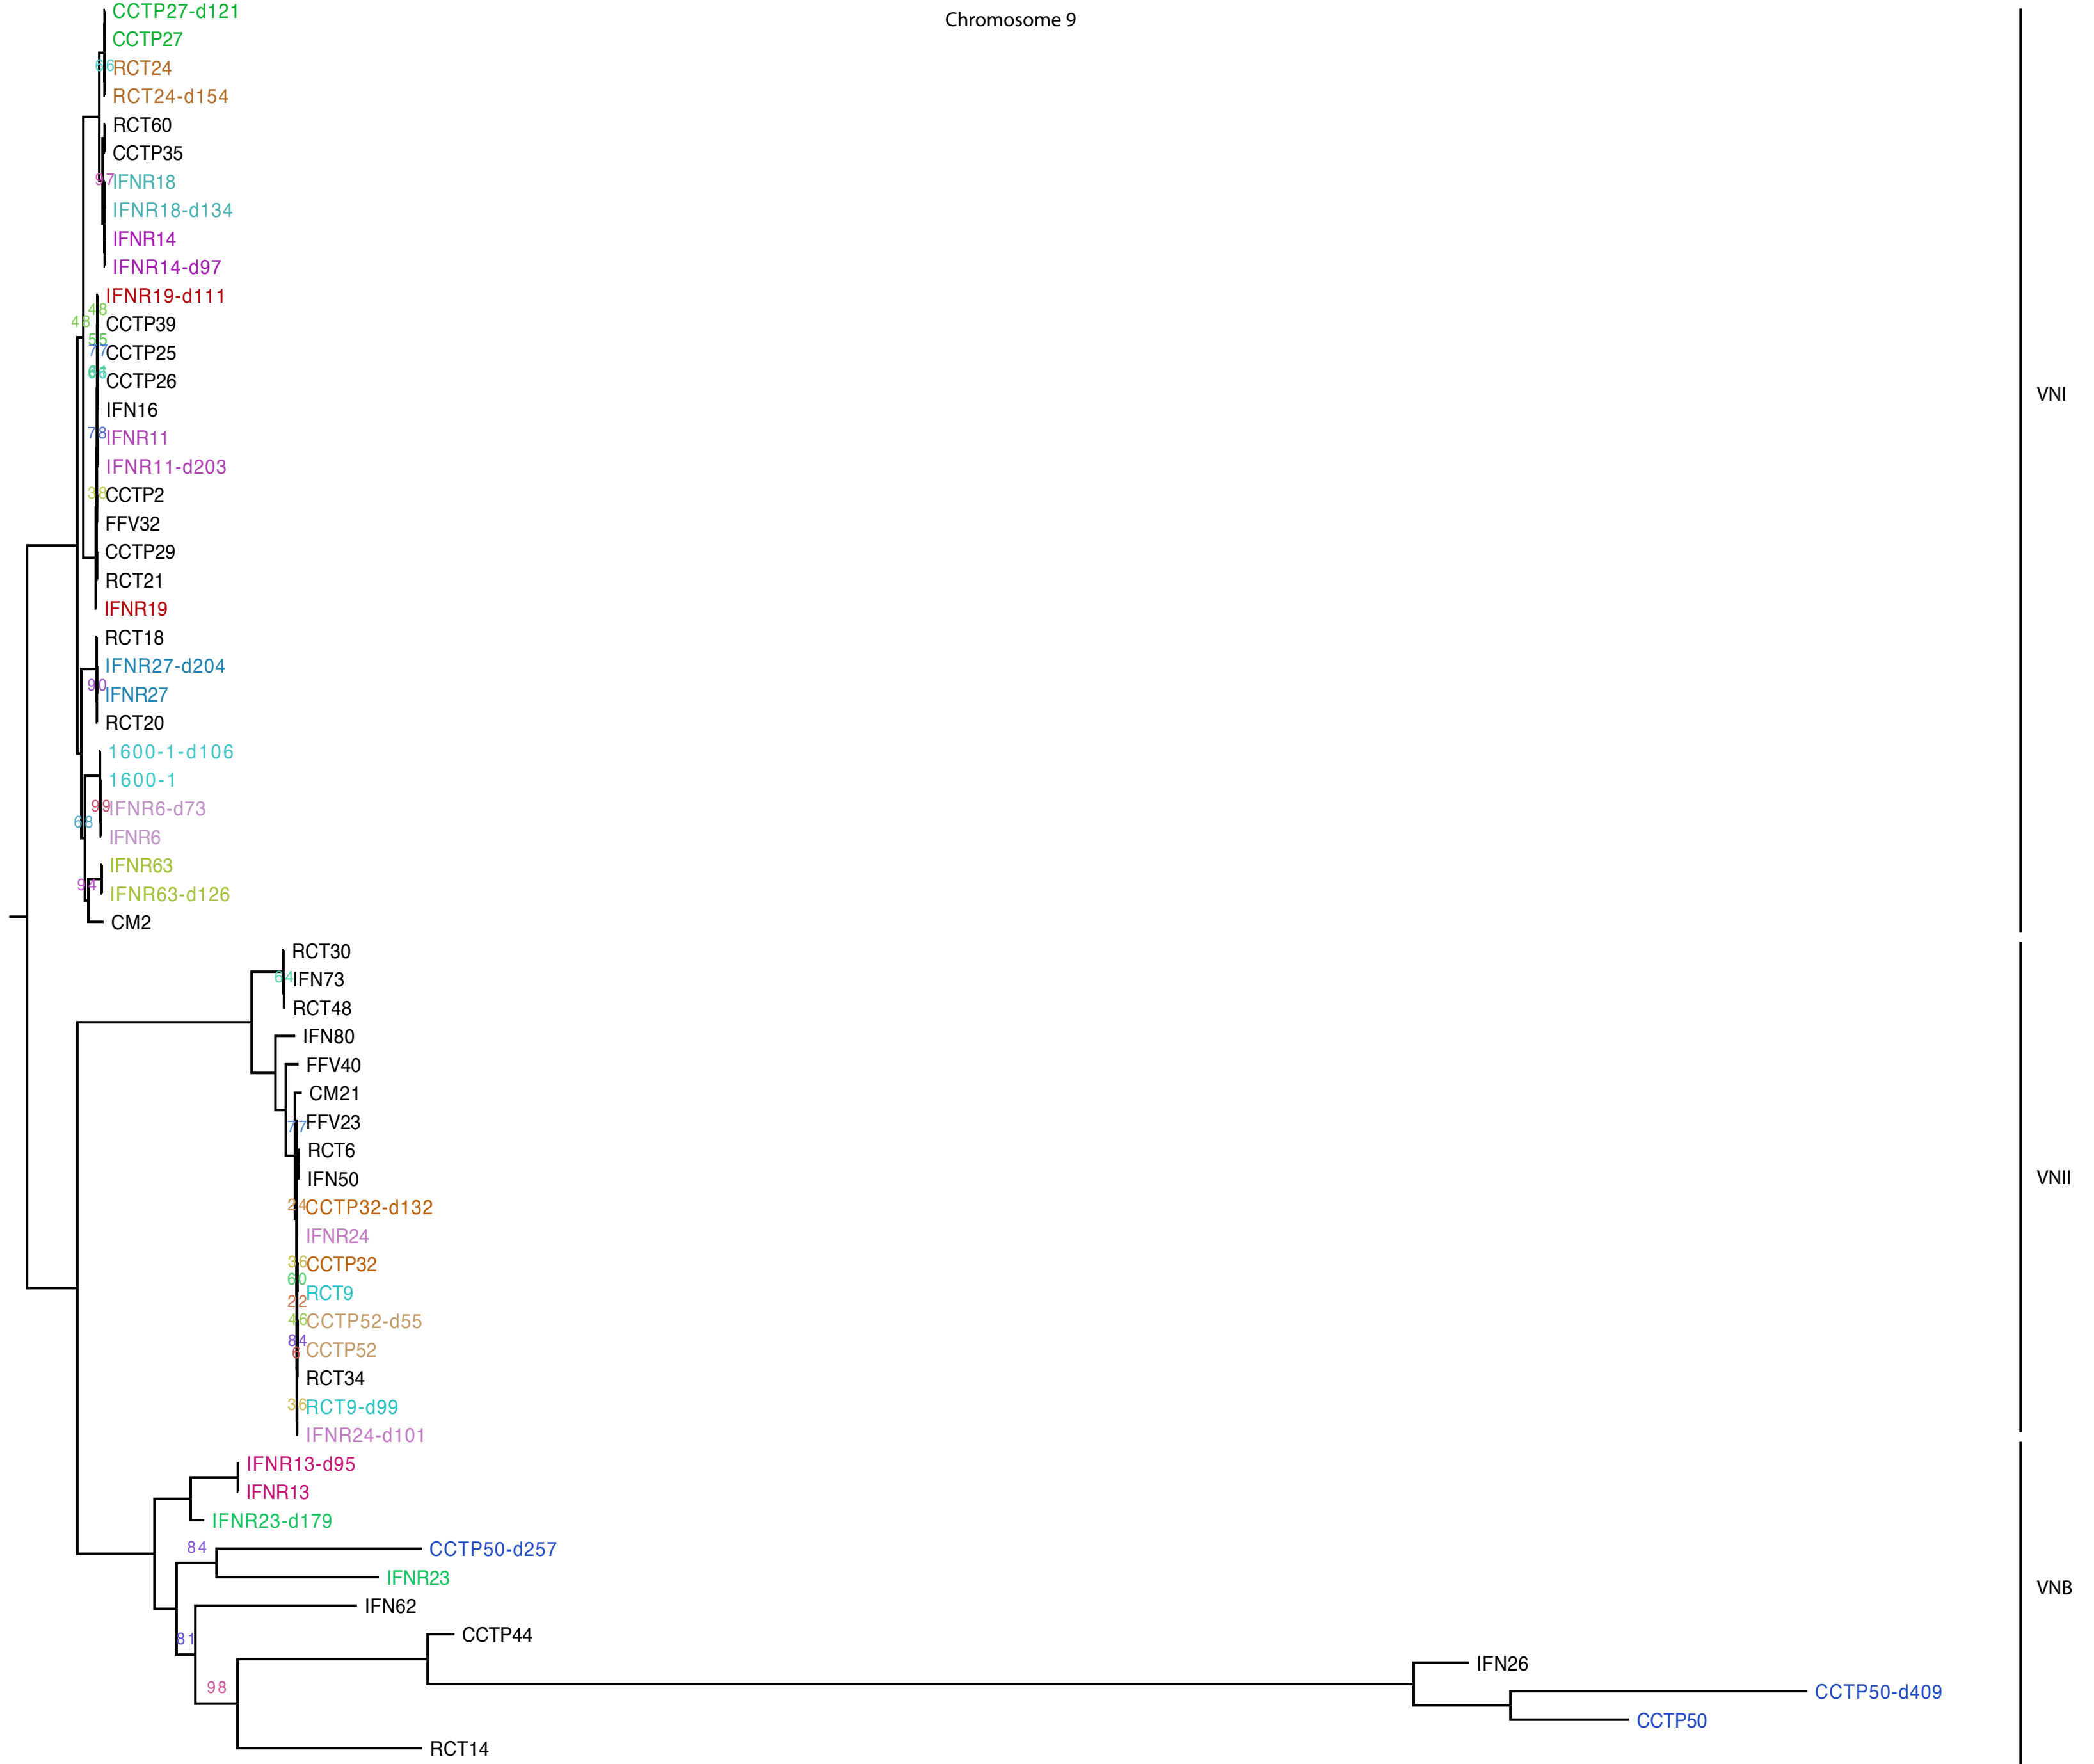

19000 SNPs

Chromosome 10

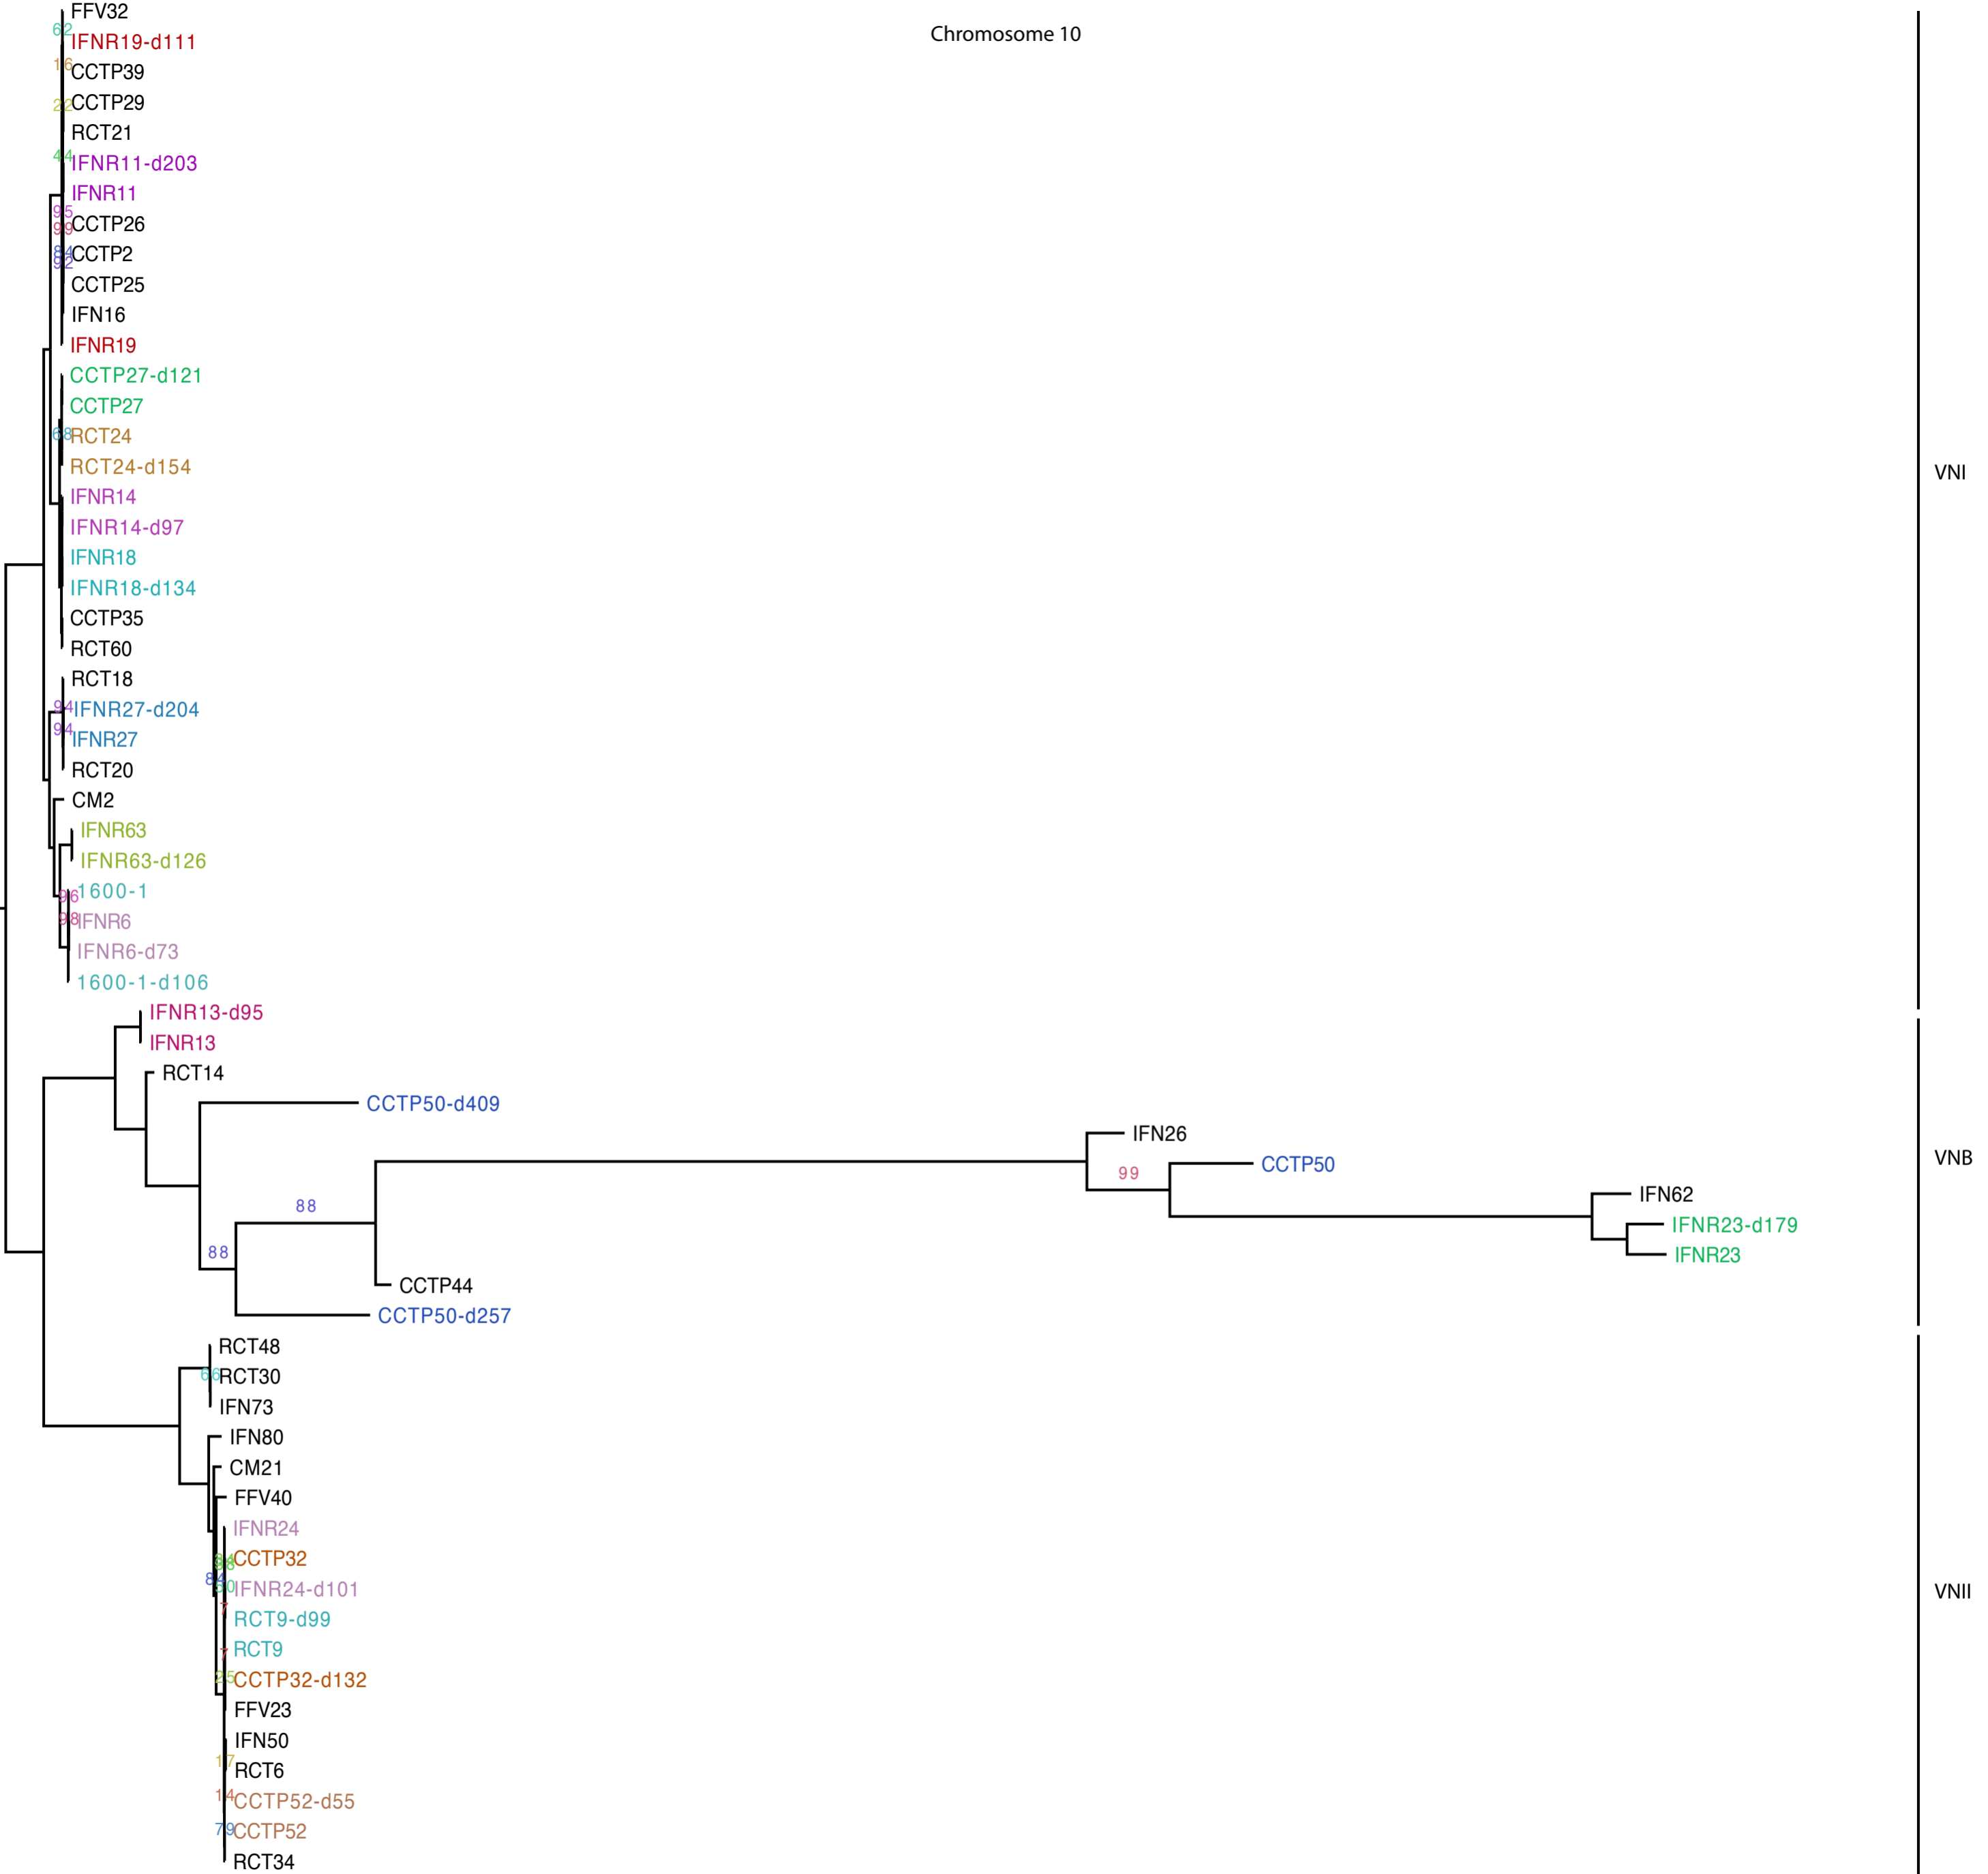

18000 SNPs

Chromosome 11

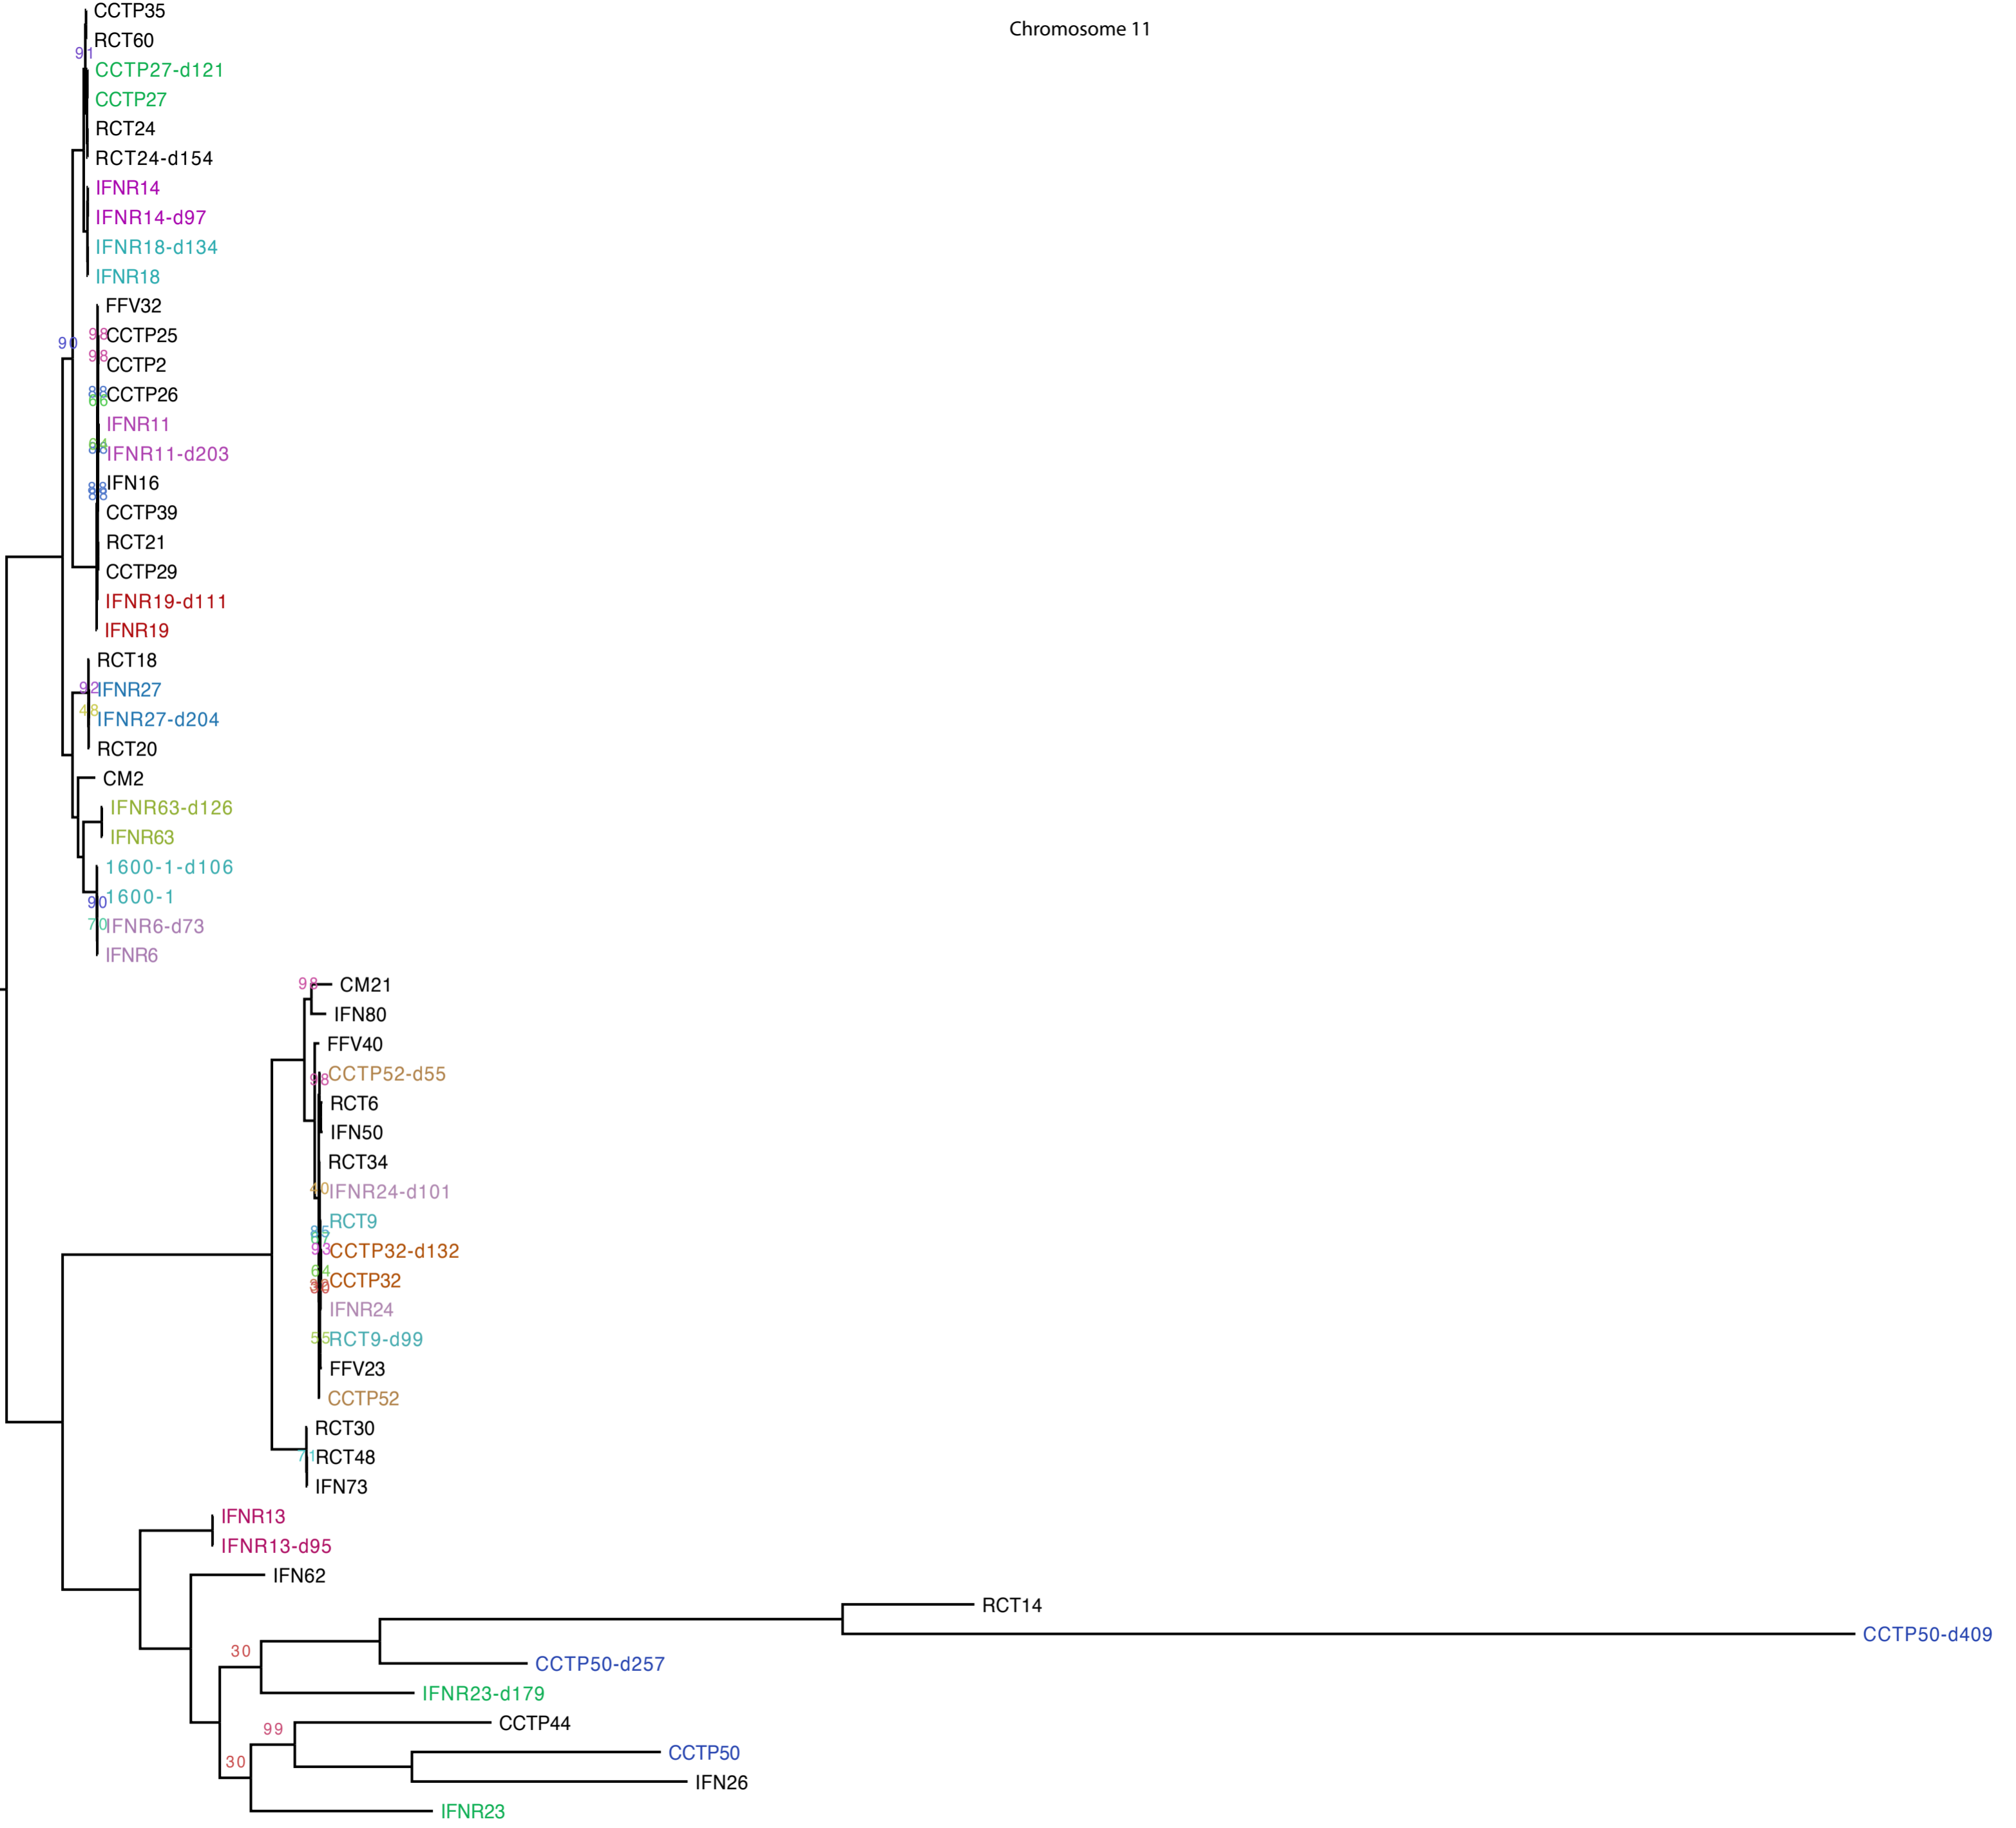

VNI

VNII

VNB

24000 SNPs

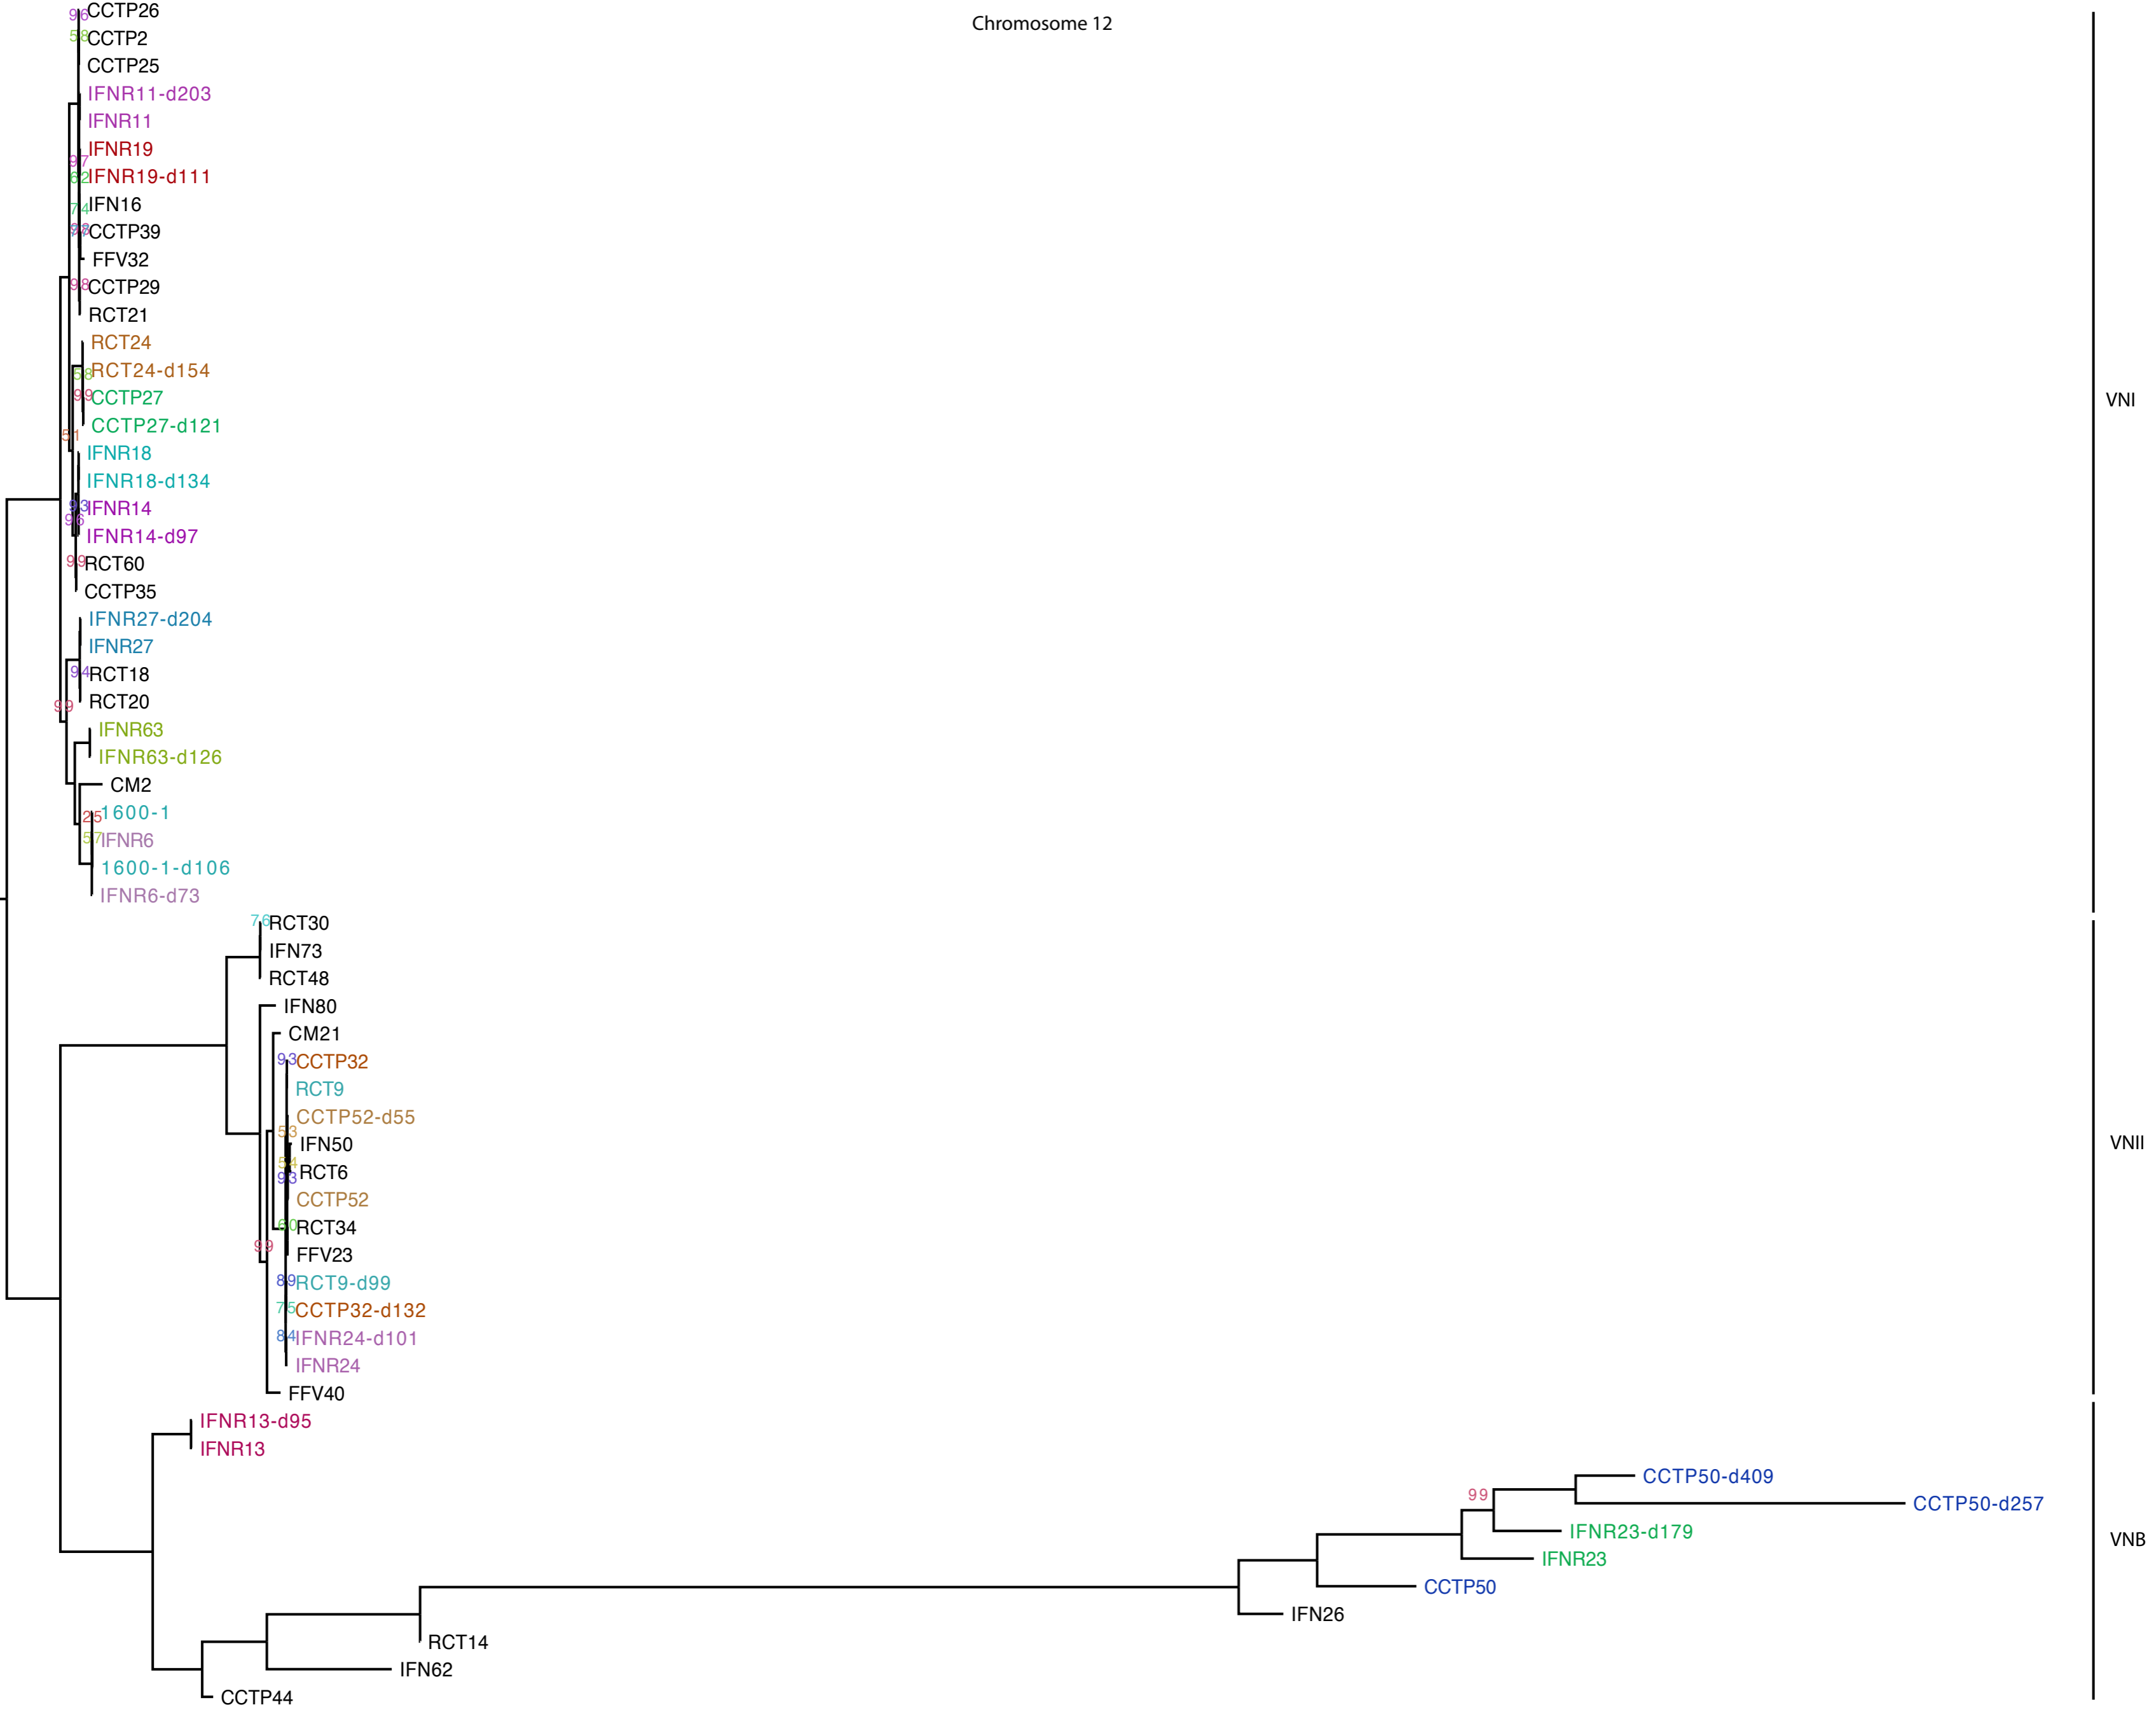

13000 SNPs

Chromosome 13

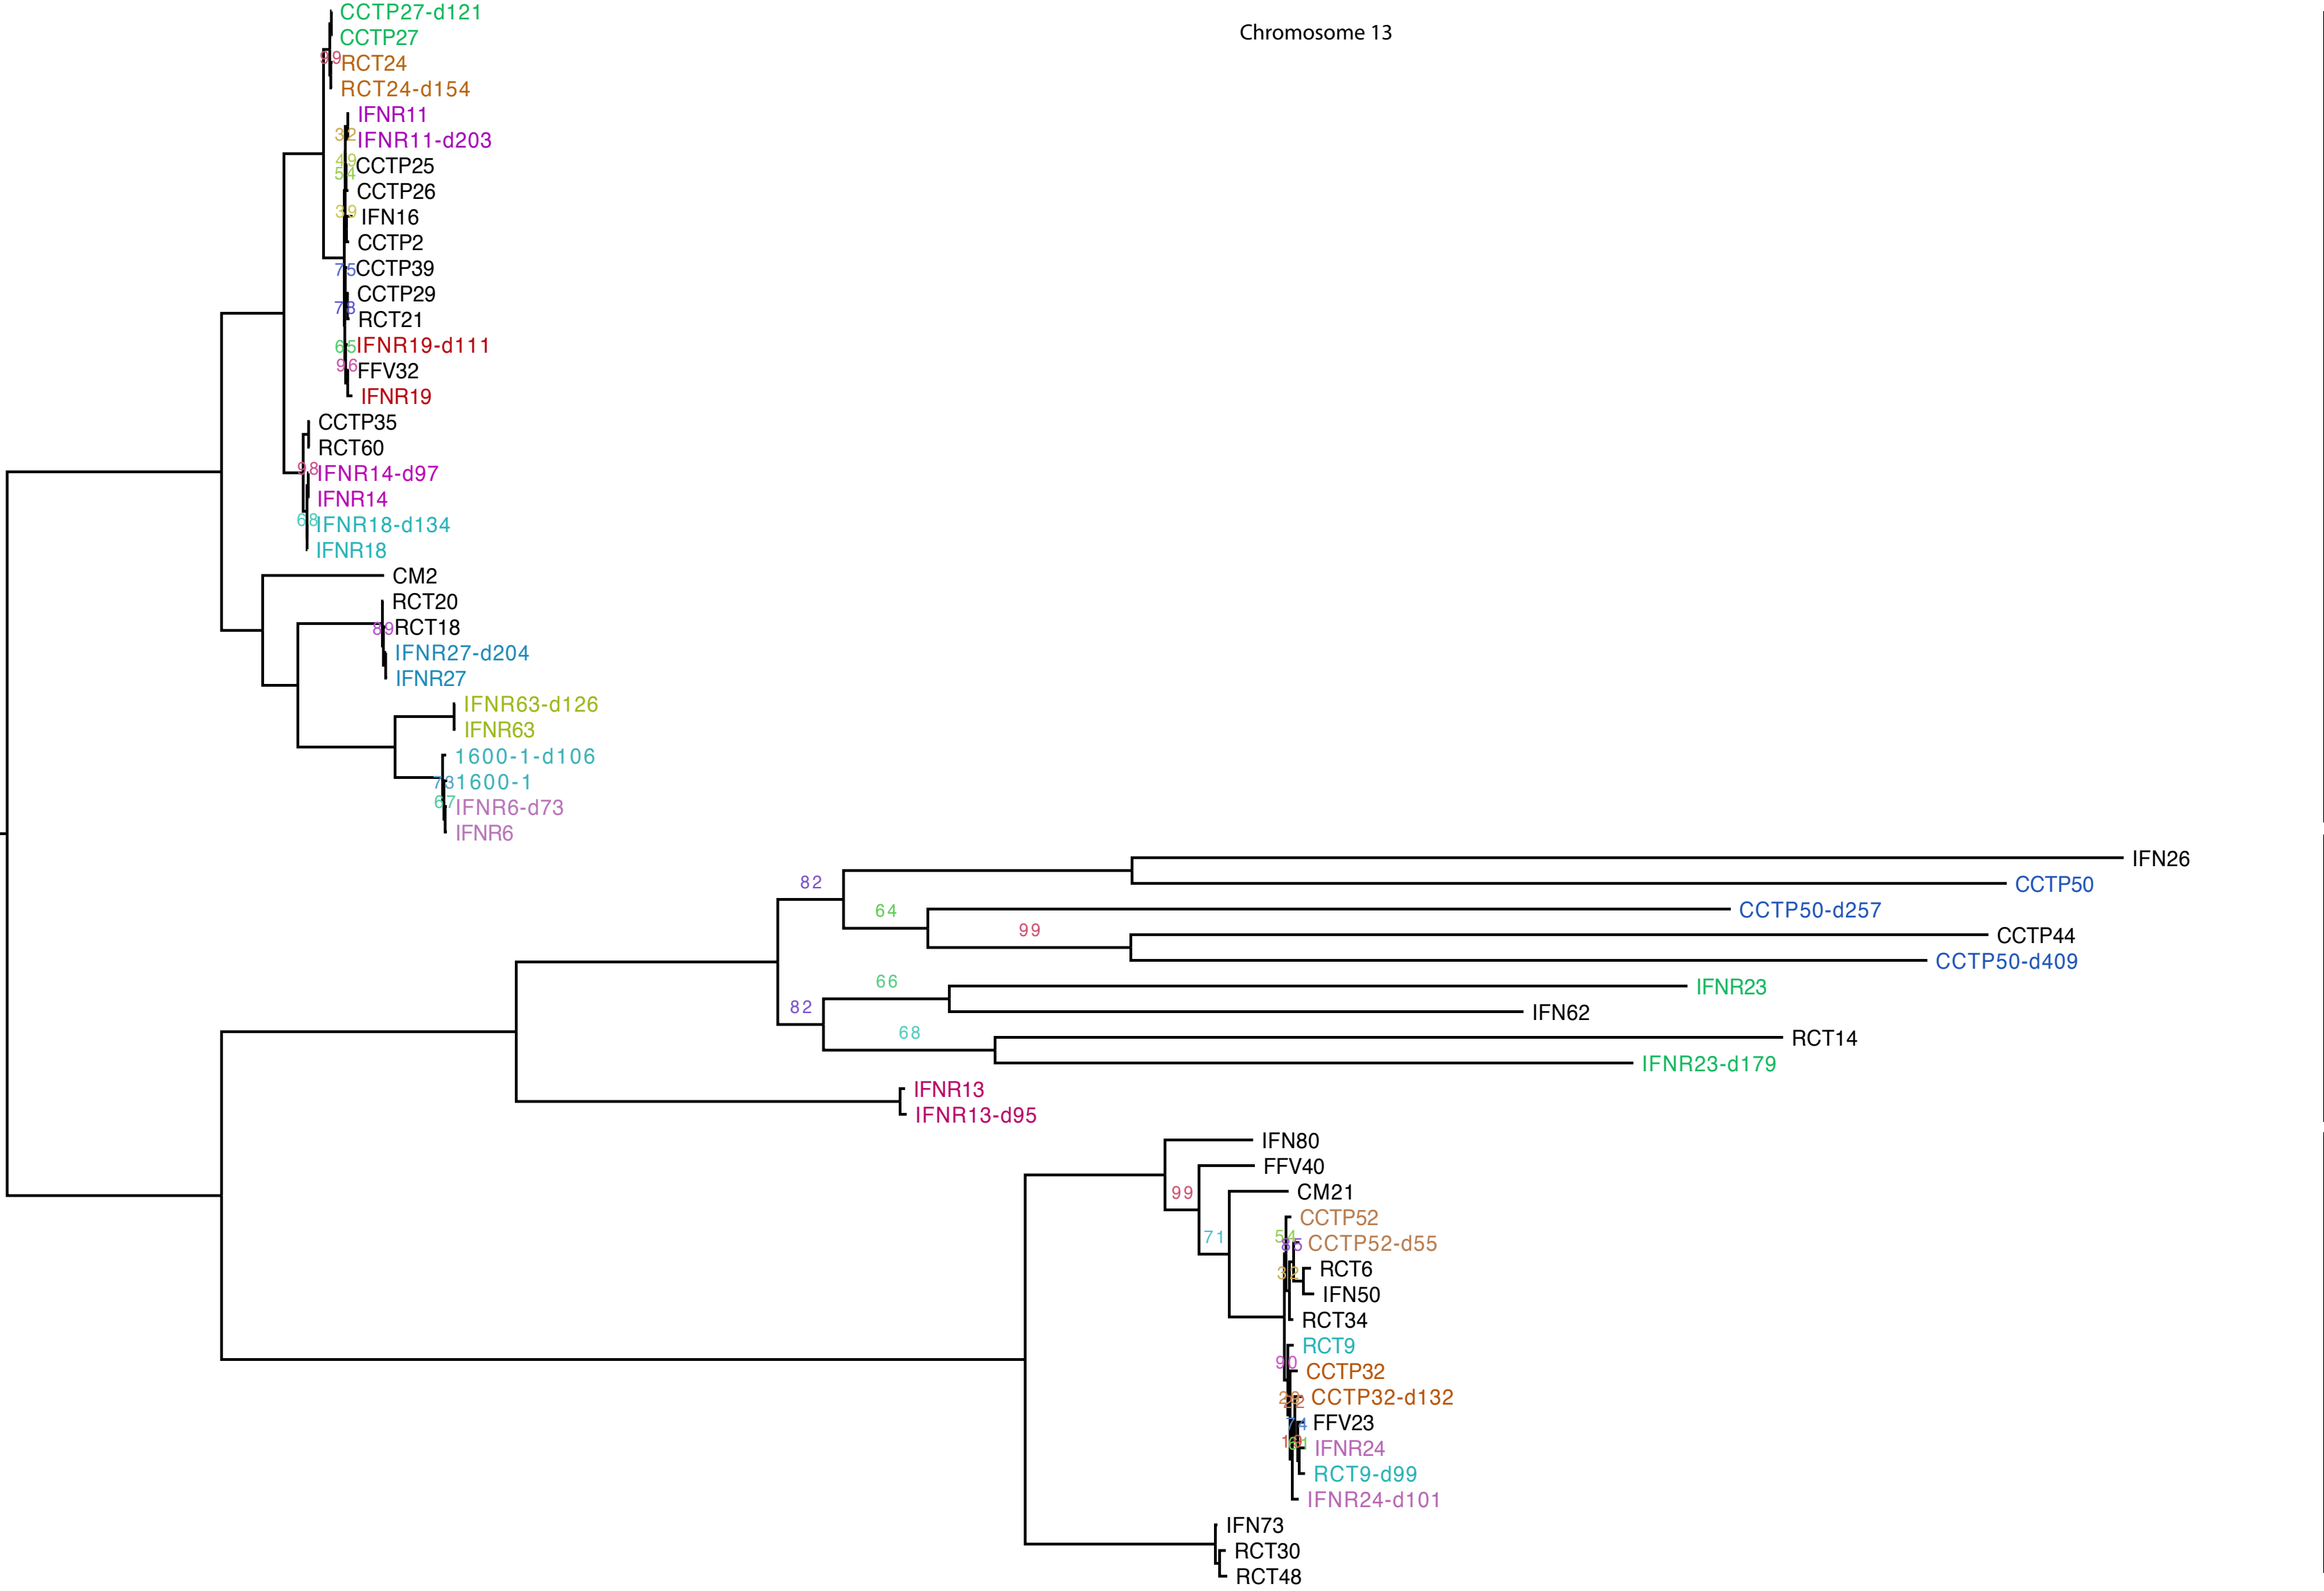

VNI

VNB

VNII

2500 SNPs

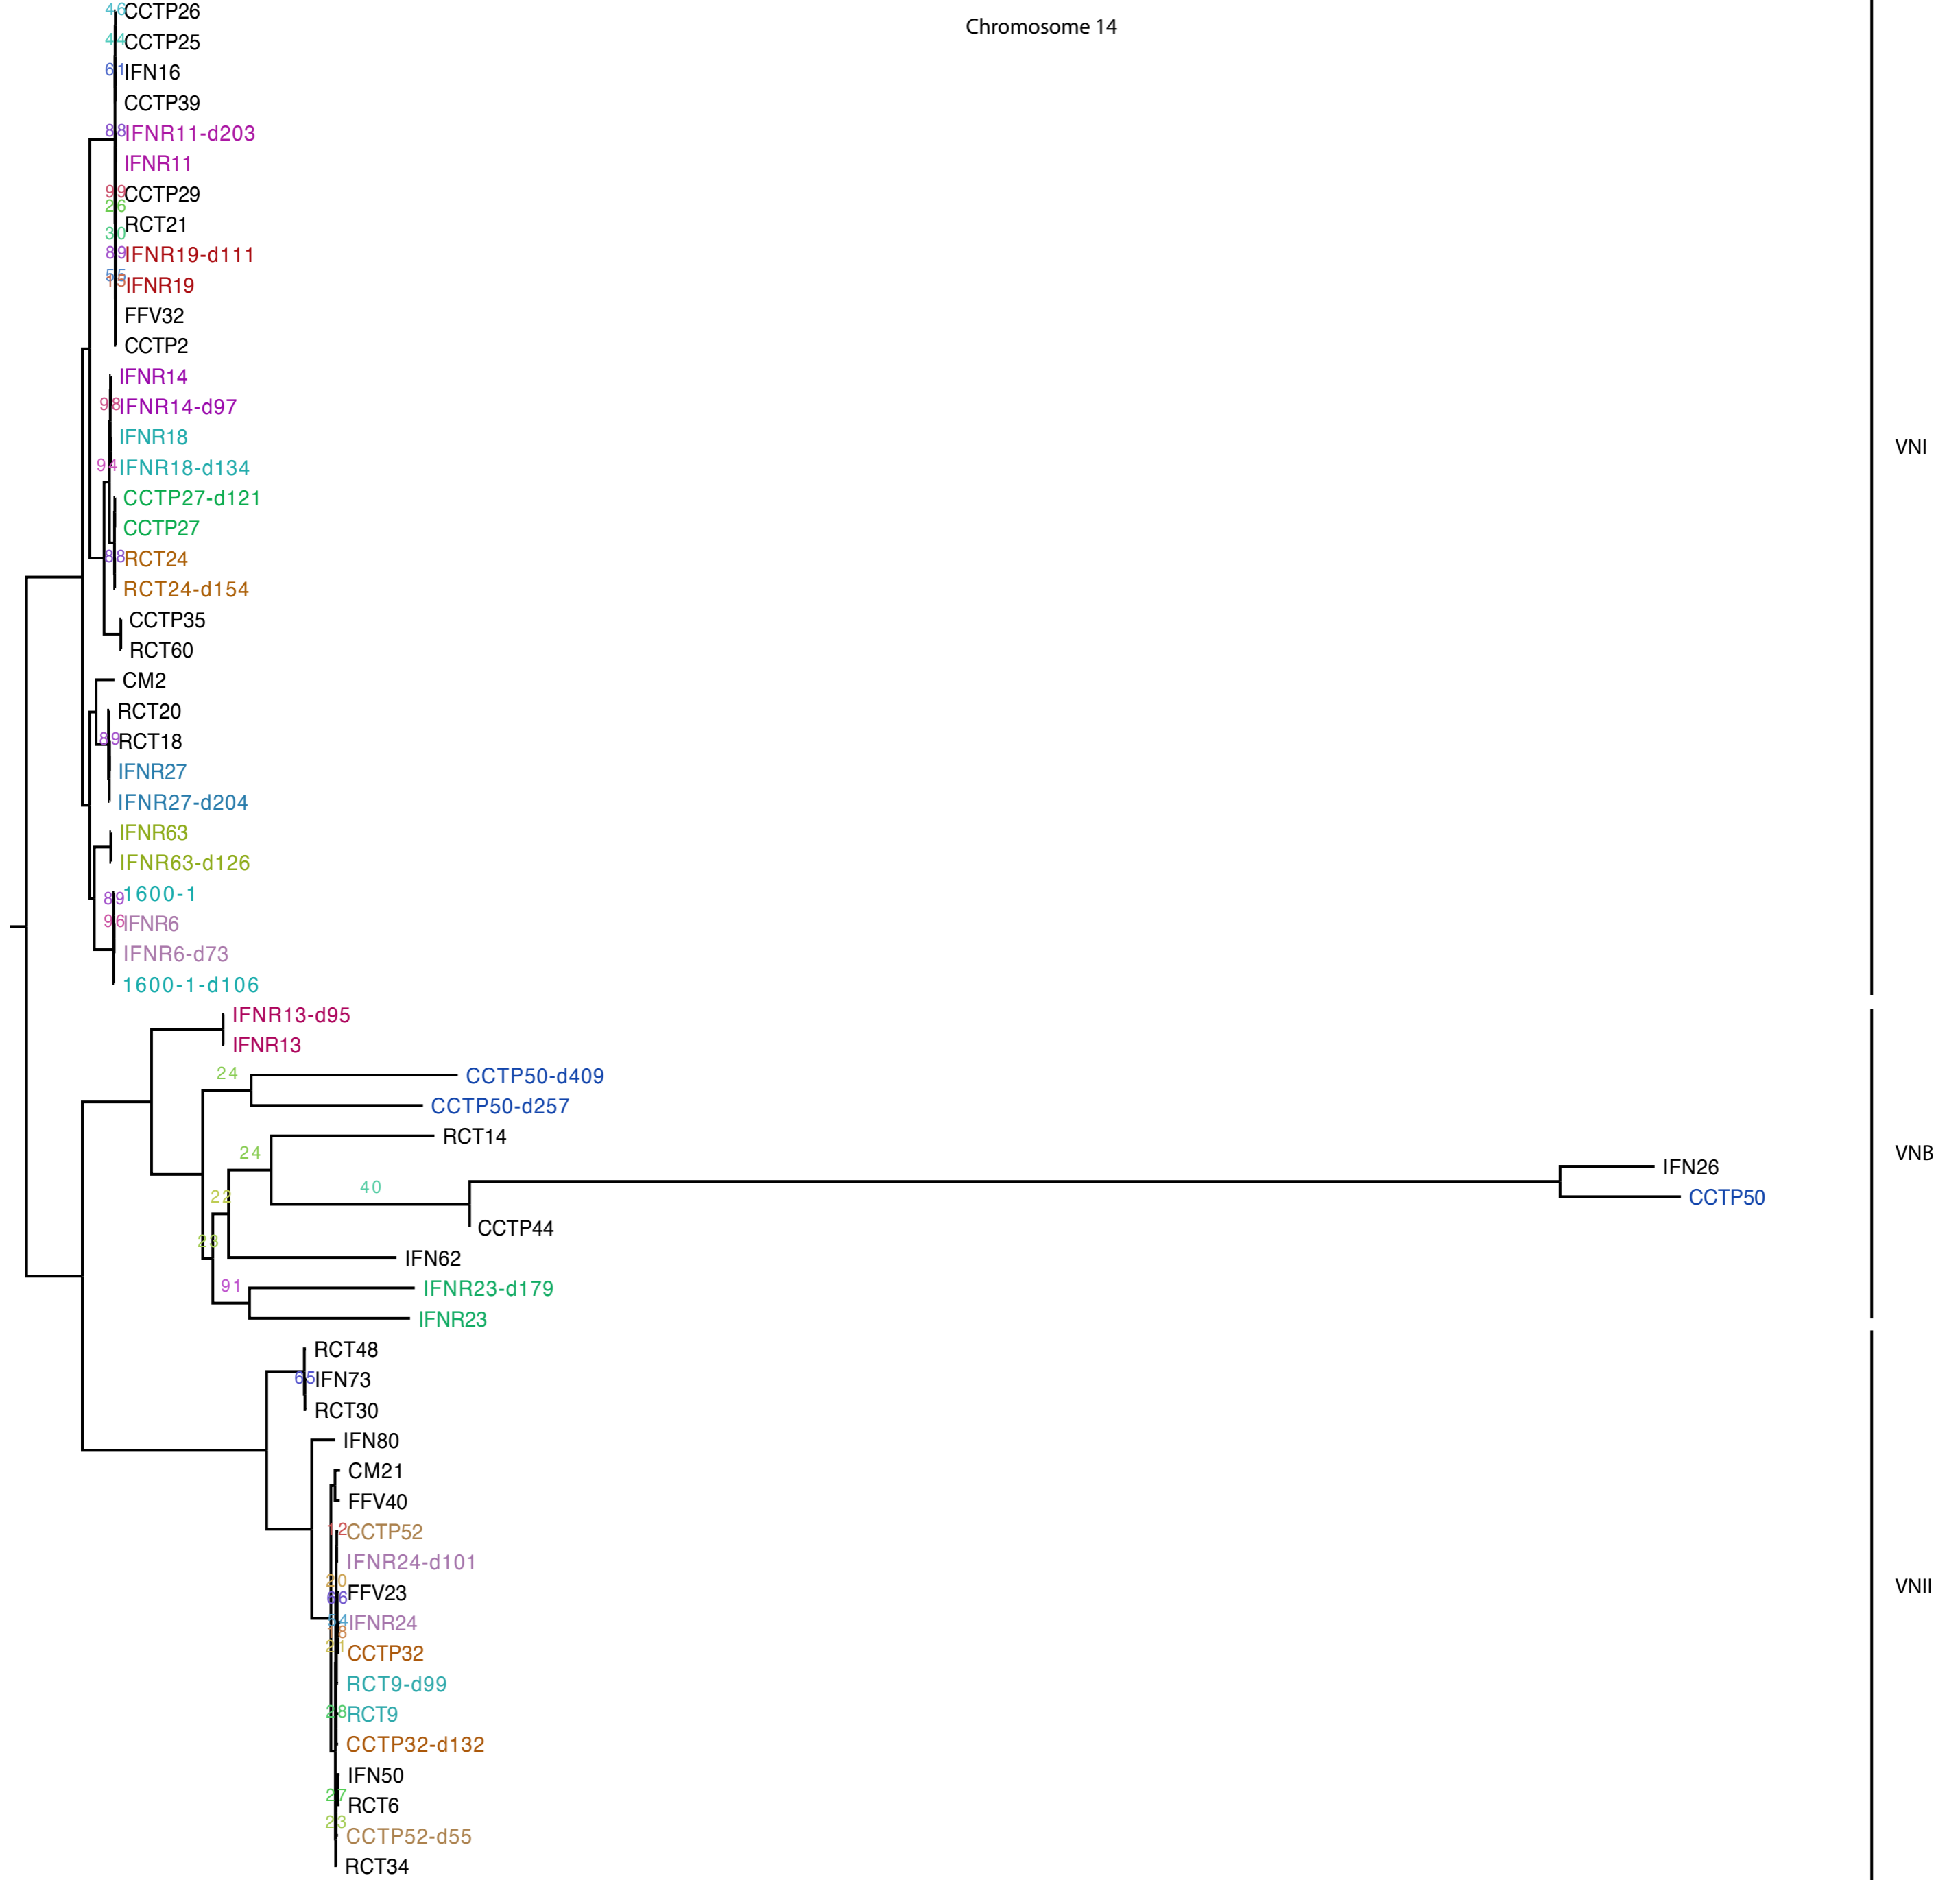

Supplement: 1165FigureS1.pdf [file 1165FigureS1.pdf]
