# Supplementary material for: A Population Genomics Approach to Assessing the Genetic Basis of Within-Host Microevolution Underlying Recurrent Cryptococcal Meningitis Infection
Source: G3 (Bethesda). 2017 Feb 10;7(4):1165–76. doi: 10.1534/g3.116.037499 (PMC5386865; doi:10.1534/g3.116.037499)
Supplement: Supplementary file 2 [file 1165FigureS2.pdf]

A circular genome plot for chromosome 13, showing recombination rates across the genome. The plot is divided into segments for each chromosome (Chr1 to Chr14). The recombination rate is represented by a color scale from blue (low) to red (high). The plot shows a high recombination rate in the centromeric region (Chr13) and a lower rate in the telomeric regions (Chr1 and Chr2).
